# Supplementary material for: A sequential reaction of picolinamide with benzaldehydes promoted by Pd(TFA)2: rapid access to 4,5-disubstituted 2-(pyridin-2-yl)oxazoles in n-octane
Source: Royal Society of Chemistry journal article supplement (doi:10.1039/d3ob01815f), 2023-12-19

## Supporting information

### **A Sequential Reaction of Picolinamide with Benzaldehydes Promoted by Pd(TFA)<sub>2</sub>: Rapid Access to 4,5-Disubstituted 2-(Pyridin-2-yl)oxazoles in *n*-Octane**

**Taku Nakayama, Sayaka Fujiki, Tomokatsu Enda, Shoko Kikkawa, Hidemasa Hikawa\* and Isao Azumaya\***

Faculty of Pharmaceutical Sciences, Toho University, Funabashi, Chiba 274-8510, Japan  
hidemasa.hikawa@phar.toho-u.ac.jp and isao.azumaya@phar.toho-u.ac.jp

|                                                                                |               |
|--------------------------------------------------------------------------------|---------------|
| <b>Synthesis of oxazole 3a from 4a</b>                                         | <b>S1</b>     |
| <b>Preparation of <sup>18</sup>O-picolinamide</b>                              | <b>S1</b>     |
| <b>Reaction using <sup>18</sup>O-labeled picolinamide</b>                      | <b>S2</b>     |
| <b>The reaction of nicotinamide, isonicotinamide and benzamide.</b>            | <b>S2</b>     |
| <b>Direct use of benzyl alcohol 8 for construction of the oxazole 3a</b>       | <b>S2</b>     |
| <b>Copies of <sup>1</sup>H and <sup>13</sup>C NMR spectra of all compounds</b> | <b>S4-S24</b> |

## Experimental Section

### Synthesis of oxazole 3a from 4a

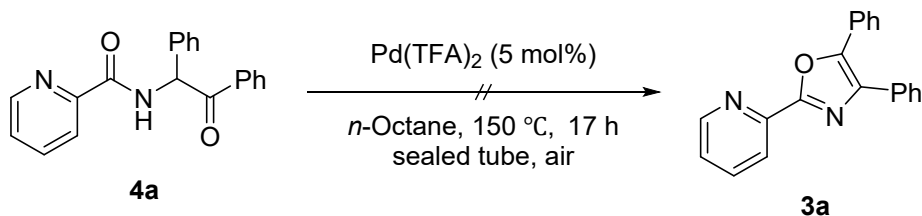

A mixture of compound **4a** (316 mg, 1 mmol) and Pd(TFA)<sub>2</sub> (17 mg, 0.05 mmol) in octane (4 mL) was heated at 150 °C for 17 h in a sealed tube under air. After cooling, 1,3,5-trimethoxybenzene (168 mg, 1 mmol, internal standard) was added. The sample was dissolved in CDCl<sub>3</sub>, which was analyzed by <sup>1</sup>H-NMR spectroscopy.

### Preparation of <sup>18</sup>O-picolinamide<sup>1</sup>

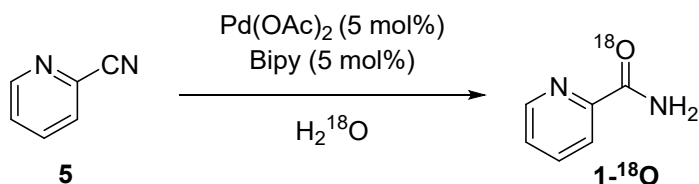

A mixture of 2-cyanopyridine (1.043 g, 10 mmol), palladium(II) acetate (112 mg, 0.5 mmol), 2,2'-bipyridyl (79 mg, 0.5 mmol) in H<sub>2</sub><sup>18</sup>O (1 mL) was heated at 120 °C for 20 h in a sealed tube under air. After cooling, the reaction mixture was poured into water and extracted with CHCl<sub>3</sub>. The organic layer was washed with brine, dried over MgSO<sub>4</sub> and concentrated in vacuo. The residue was purified by flash column chromatography (silica gel, hexane/EtOAc) to give desired product <sup>18</sup>O-picolinamide (879 mg, 71%) as a white solid.

mp: 106-107 °C; <sup>1</sup>H NMR (400 MHz, DMSO-*d*<sub>6</sub>): δ 7.59 (ddd, *J* = 7.3, 4.8, 1.4 Hz, 1H), 7.65 (brs, 1H), 7.98 (ddd, *J* = 7.9, 7.3, 1.6 Hz, 1H), 8.02-8.05 (m, 1H), 8.12 (brs, 1H), 8.63 (ddd, *J* = 4.8, 1.6, 0.9 Hz, 1H); <sup>13</sup>C NMR (100 MHz, DMSO-*d*<sub>6</sub>): δ 121.9, 126.5, 137.6, 148.5, 150.3, 166.0; FT-IR (KBr, cm<sup>-1</sup>): 3419, 3182, 1603; HRMS (FAB): *m/z* [M+H]<sup>+</sup> calcd for [M+H]<sup>+</sup> = C<sub>6</sub>H<sub>6</sub>N<sub>2</sub><sup>18</sup>O: 125.0601; found: 125.0601.

### Reaction using <sup>18</sup>O-labeled picolinamide<sup>2</sup>

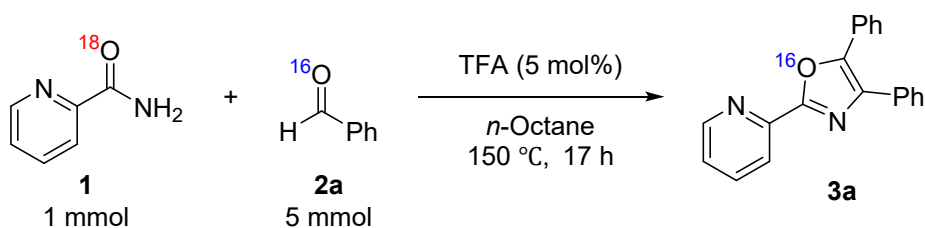

Prepared according to the general procedure by using <sup>18</sup>O-2-picolinamide (124 mg, 1 mmol), Pd(TFA)<sub>2</sub> (17 mg, 5 mol %) and benzaldehyde (505 μL, 5 mmol) in octane (4 mL) at 150 °C for 17 h. The desired product 3a was obtained in 50% yield (150 mg) as a light yellow solid.

HRMS (EI): *m/z* [M]<sup>+</sup> calcd for [M]<sup>+</sup> = C<sub>20</sub>H<sub>14</sub>N<sub>2</sub>O: 298.1106; found:298.1106.

### The reaction of nicotinamide, isonicotinamide and benzamide.<sup>3</sup>

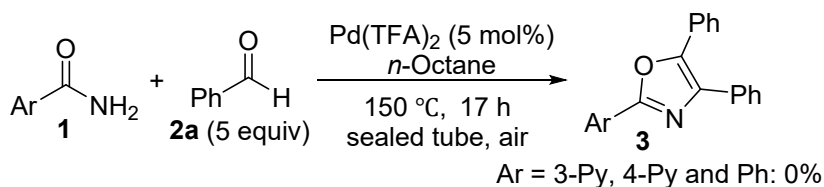

Prepared according to the general procedure by using nicotinamide (122 mg, 1 mmol) or isonicotinamide (122 mg, 1 mmol) or benzamide (121 mg, 1 mmol), Pd(TFA)<sub>2</sub> (17 mg, 5 mol %) and benzaldehyde (505 μL, 5 mmol) in octane (4 mL) at 150 °C for 17 h. After a cooling, 1,3,5-trimethoxybenzene (1 mmol) was added as an internal standard. The desired product was not be confirmed using <sup>1</sup>H NMR spectrometry.

### Direct use of benzyl alcohol 8 for construction of the oxazole 3a

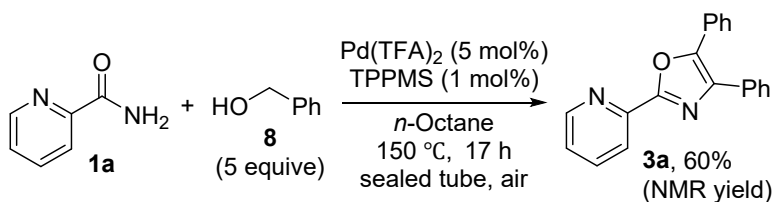

A mixture of picolinamide 1a (122 mg, 1 mmol), Pd(OAc)<sub>2</sub> (17 mg, 0.05 mmol), sodium diphenylphosphinobenzene-3-sulfonate (TPPMS, 4 mg, 0.01 mmol), and benzyl alcohol 2a (515 μL, 5 mmol), in octane (4 mL) was heated at 150 °C for 17 h in a sealed tube under air. After the reaction mixture was cooled, 1,3,5-trimethoxybenzene (168 mg, 1 mmol, internal standard) and CHCl<sub>3</sub> were added to the reaction mixture. The solution was concentrated in vacuo. The residue was analyzed by <sup>1</sup>H-NMR spectroscopy.

## References

- 1) Sharley, Daniel D. Sanz; Jonathan MJ Williams. *Tetrahedron Letters*, **2017**, 58, 43, 4090-4093.
- 2) Wasserman, H. H.; Vinick, F. J. *The Journal of Organic Chemistry*, **1973**, 38, 13, 2407-2408.
- 3) Banerji, B.; Adhikary, S.; Majumder, L.; Ghosh, S. *Asian Journal of Organic Chemistry*, **2019**, 8, 4, 514-525.

# <sup>1</sup>H- and <sup>13</sup>C-NMR

## 4,5-Diphenyl-2-(pyridin-2-yl)oxazole (3a)

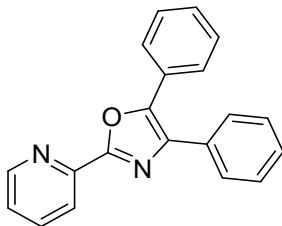

3a

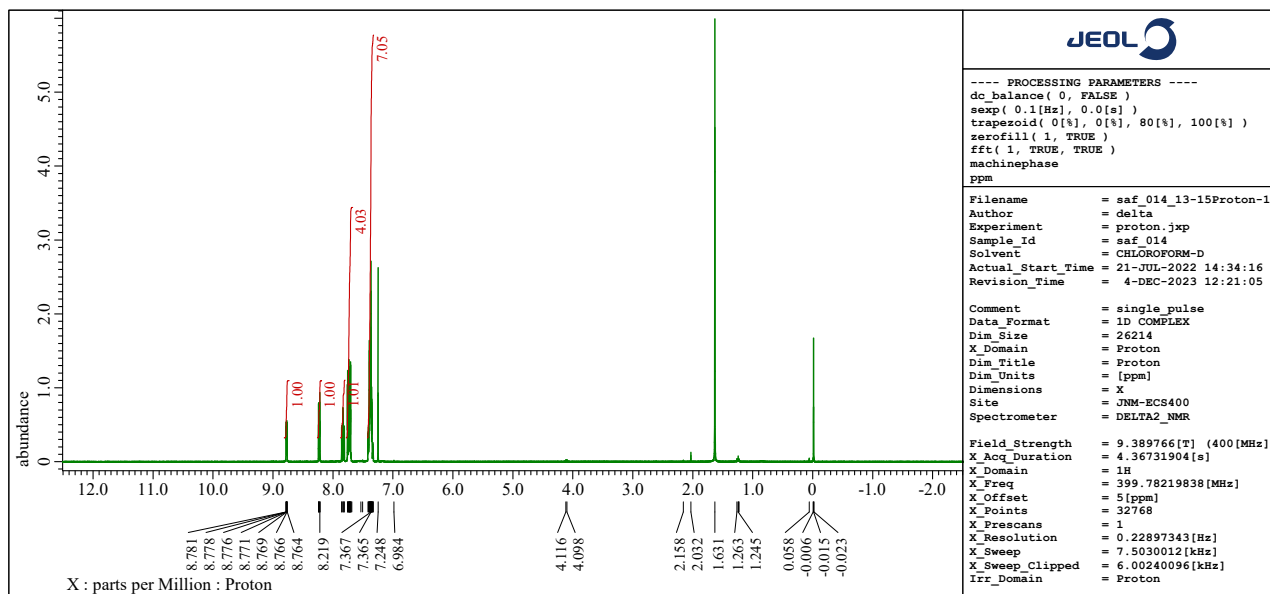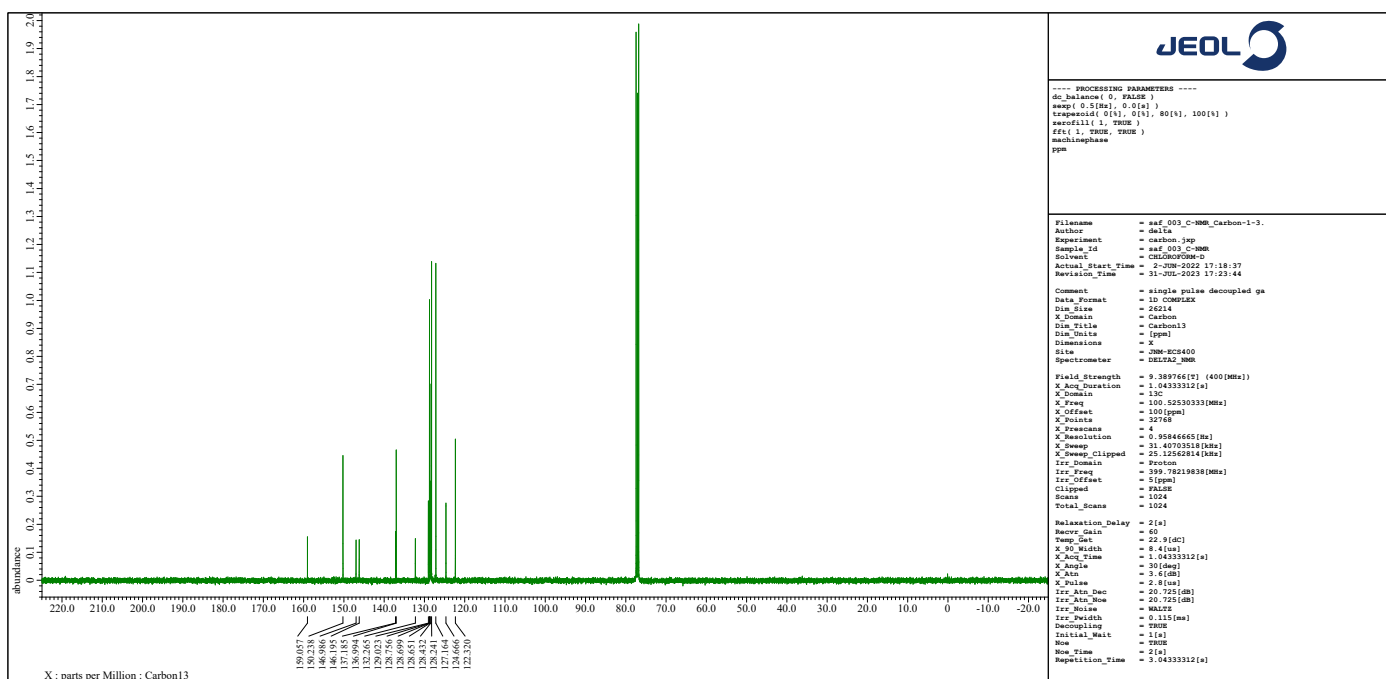

### 4,5-Bis(3-bromophenyl)-2-(pyridin-2-yl)oxazole (3b)

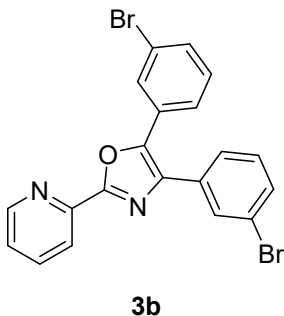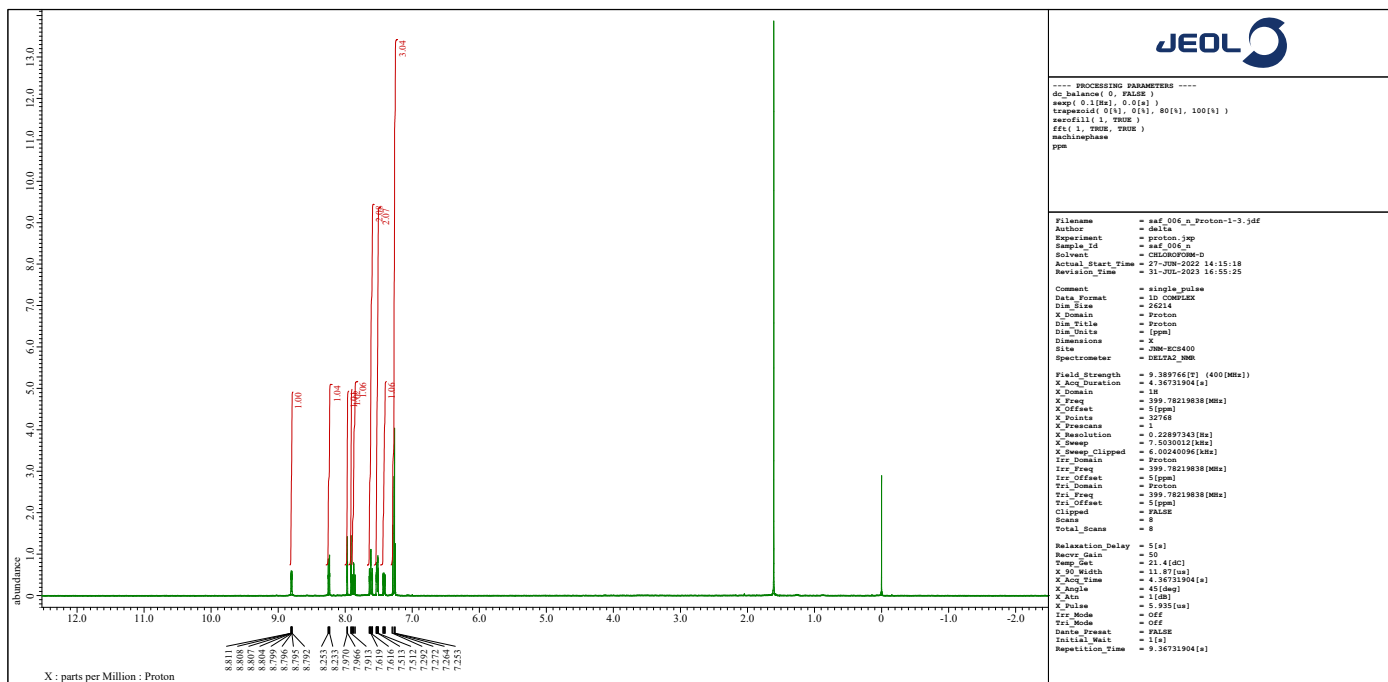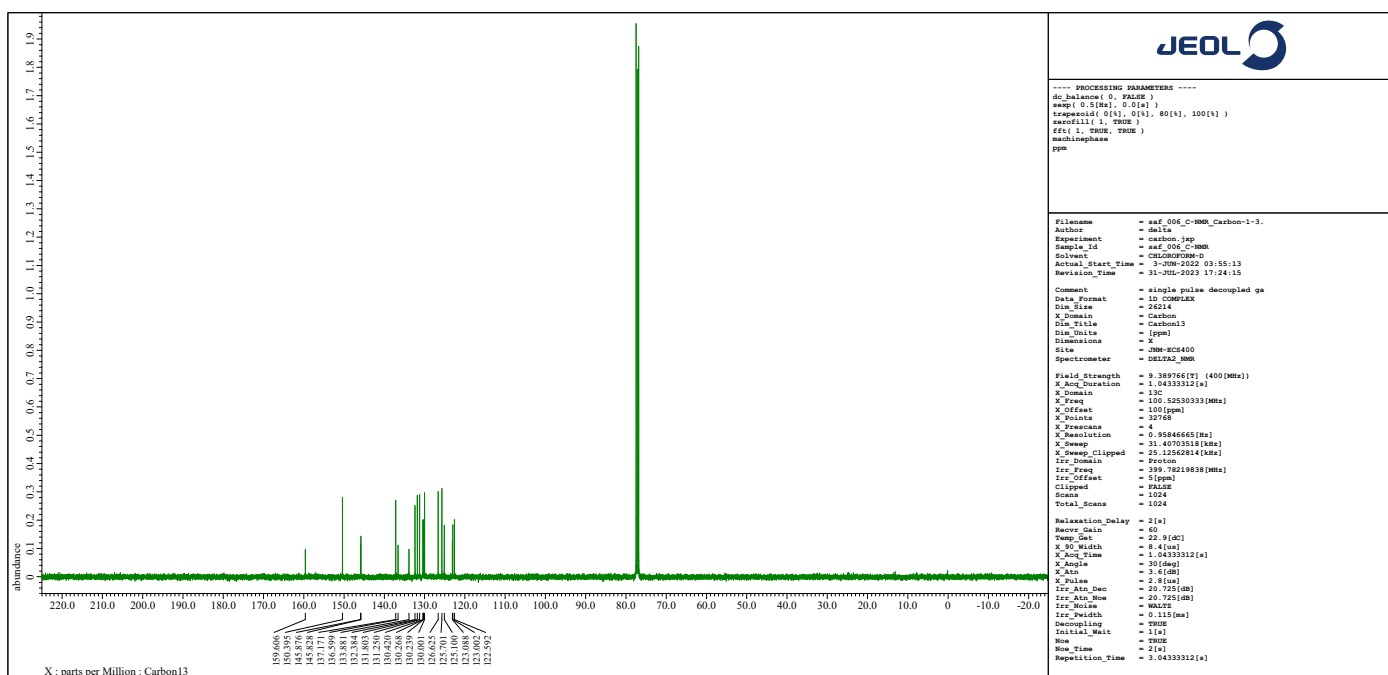

# 4,5-Bis(4-bromophenyl)-2-(pyridin-2-yl)oxazole (3c)

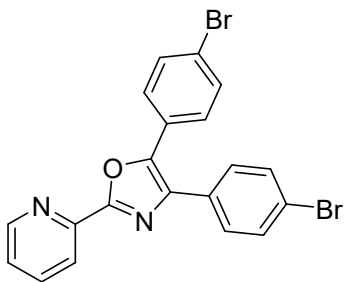

**3c**

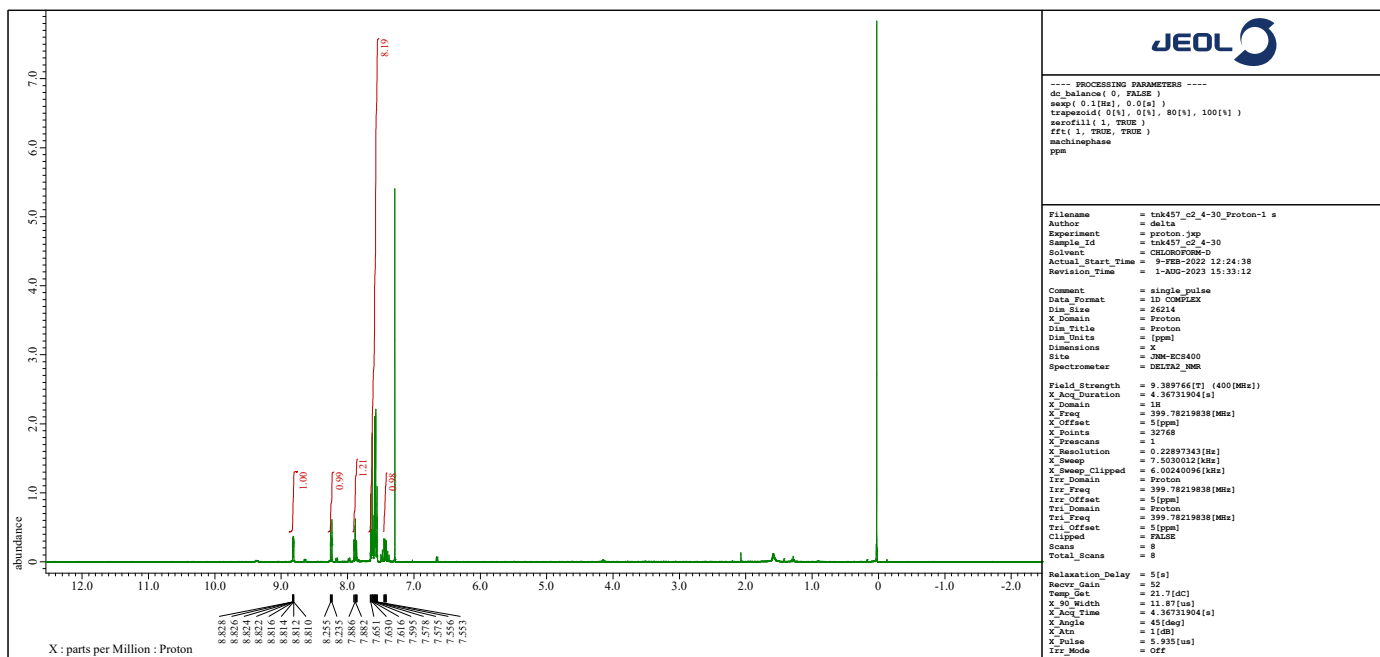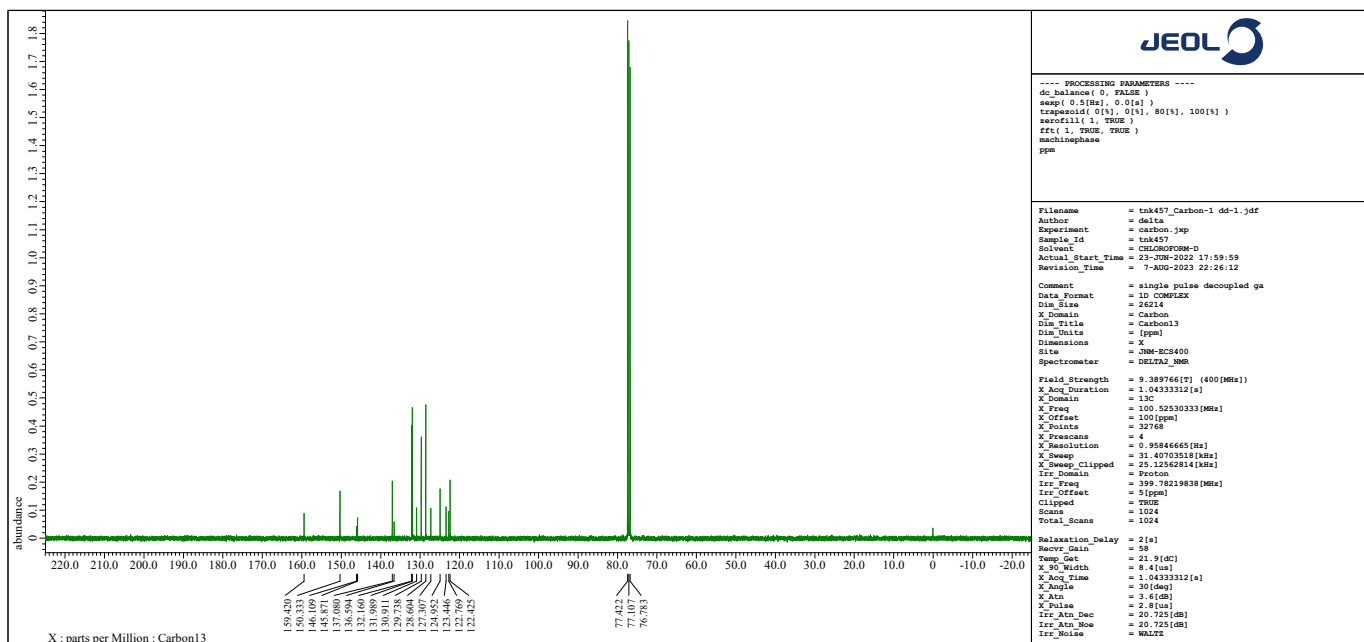

# 4,5-Bis(4-chlorophenyl)-2-(pyridin-2-yl)oxazole (3d)

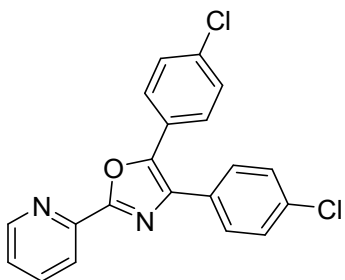

3d

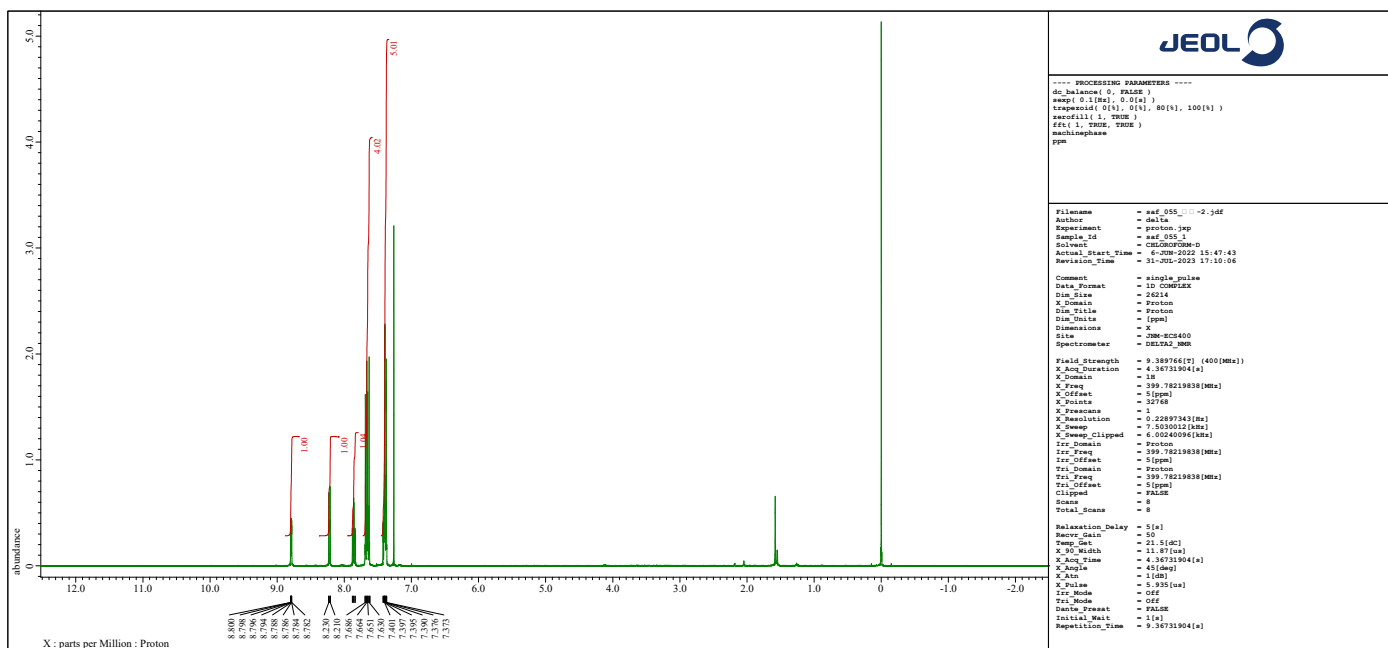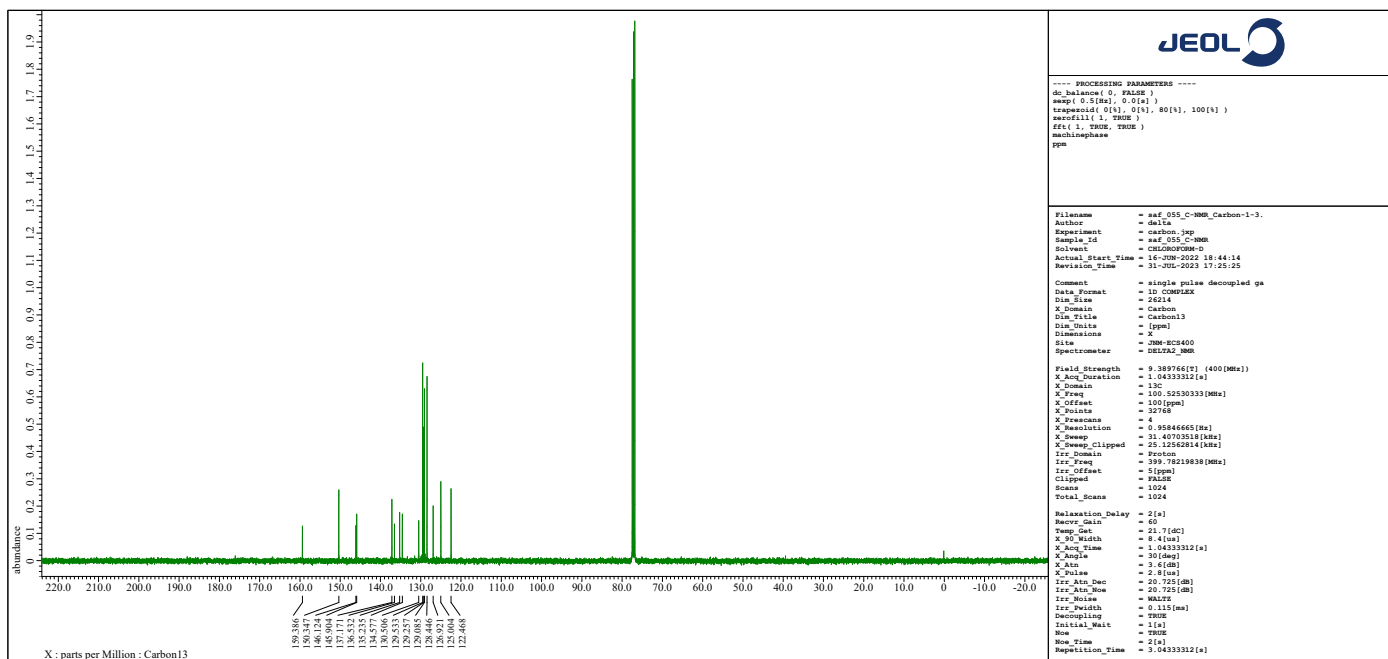



# 4,5-Bis(4-fluorophenyl)-2-(pyridin-2-yl)oxazole (3e)

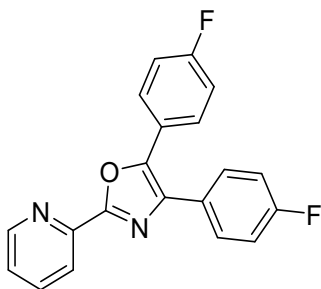

3e

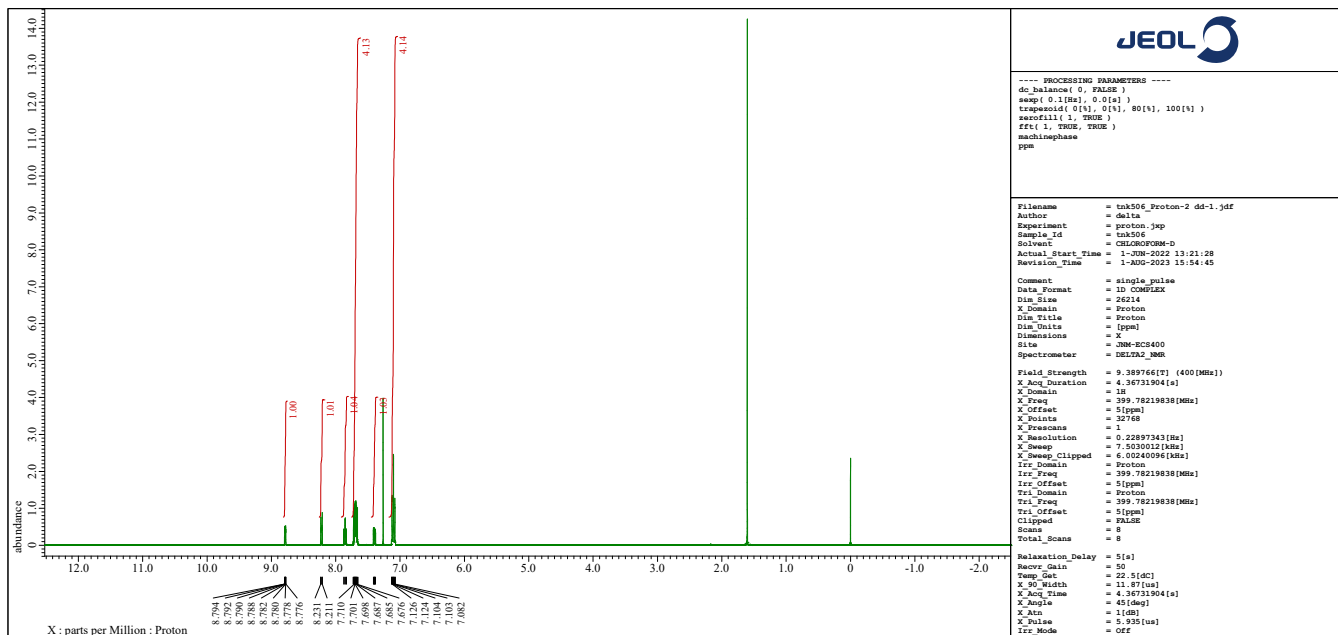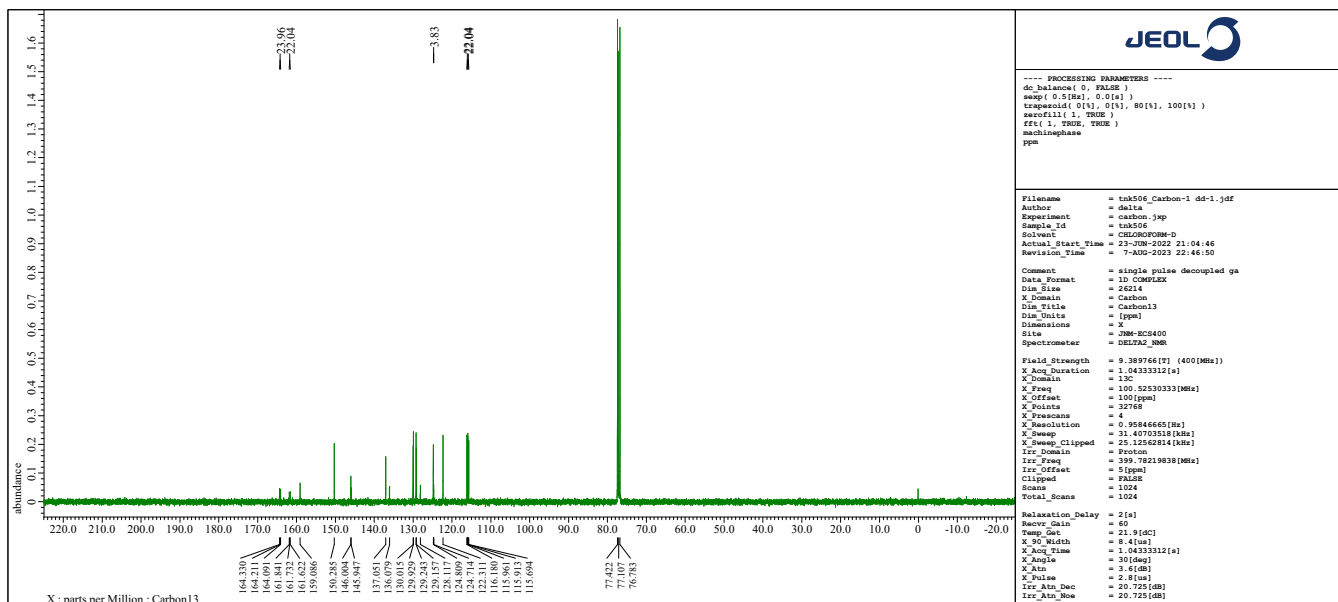

# 4,5-Bis(2-bromophenyl)-2-(pyridin-2-yl)oxazole (3f)

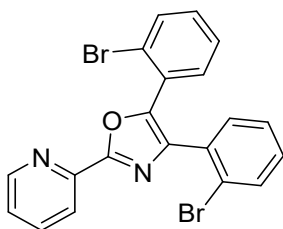

**3f**

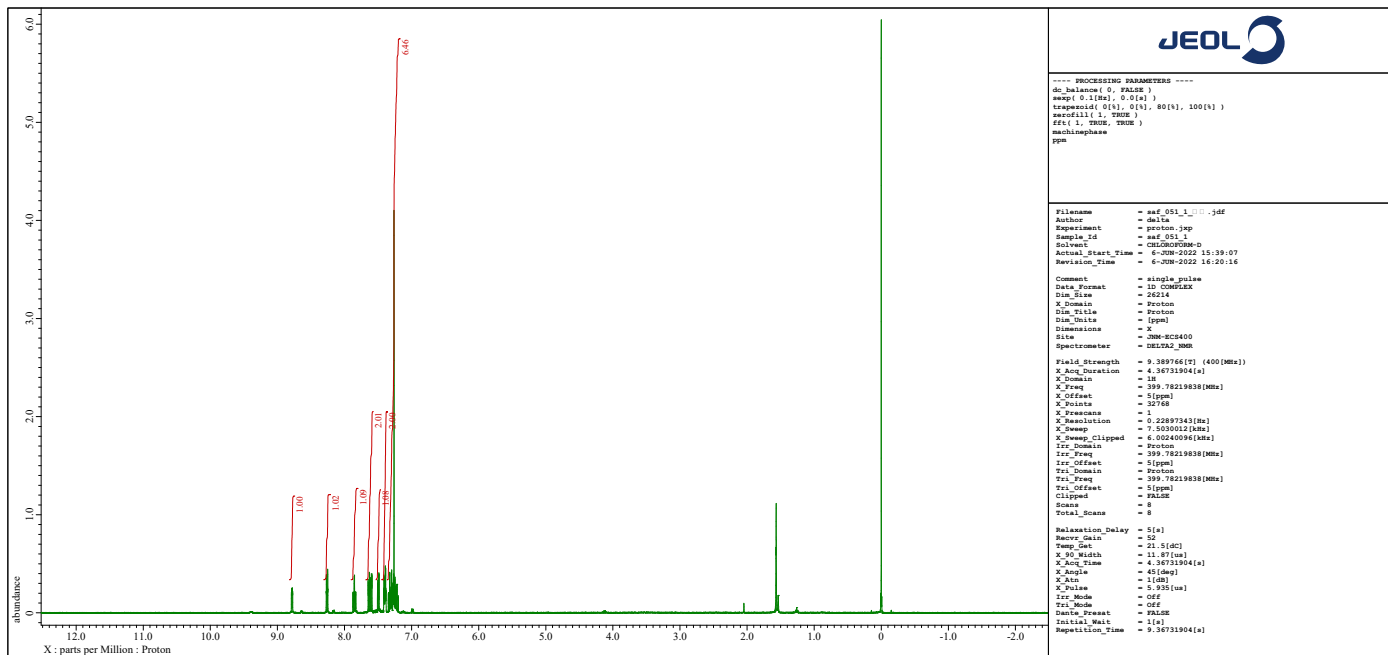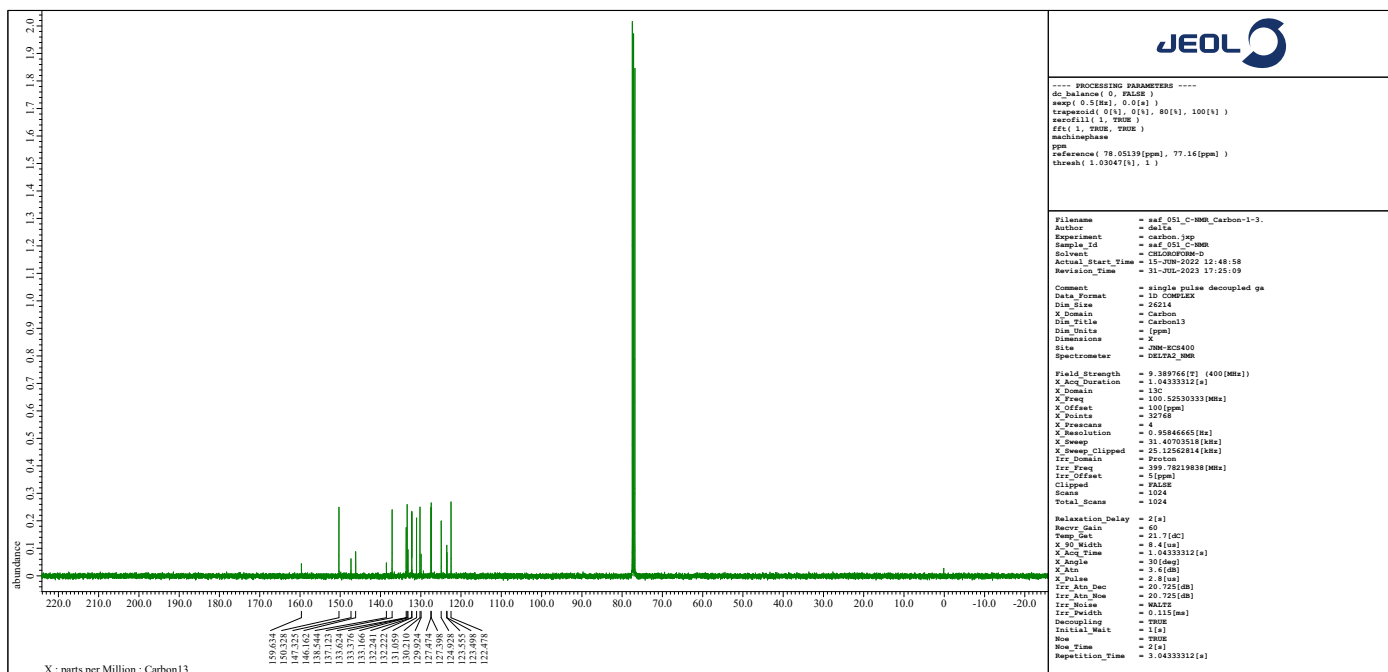

4,4'-(2-(Pyridin-2-yl)oxazole-4,5-diyl)dibenzonitrile (3g)

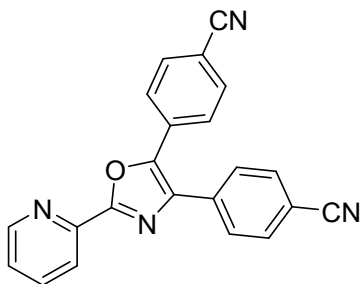

3g

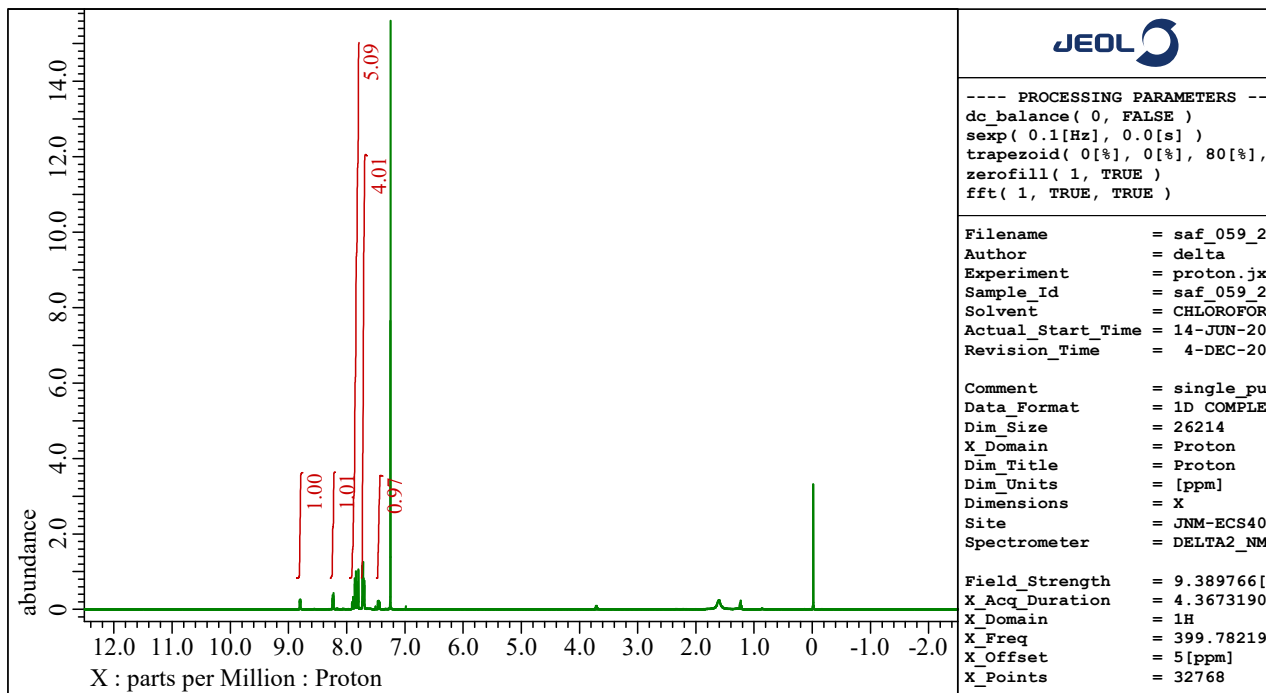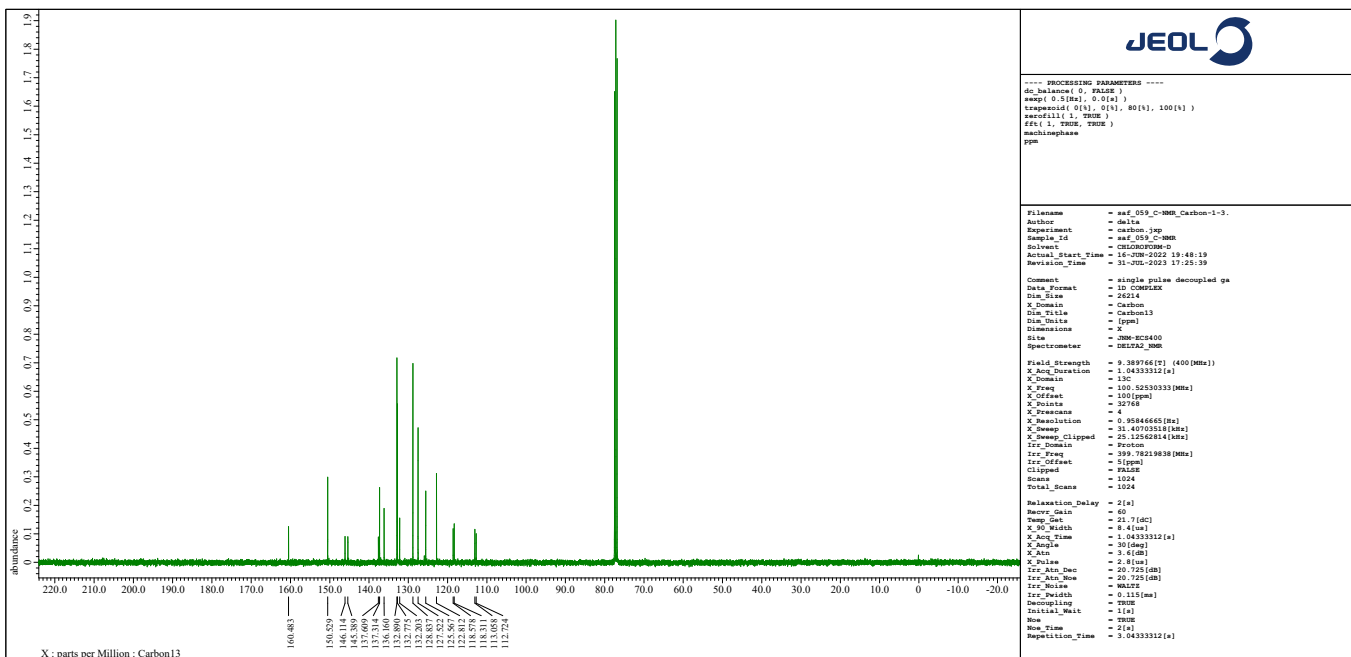

# Dimethyl 4,4'-(2-(pyridin-2-yl)oxazole-4,5-diyl)dibenzoate (3h)

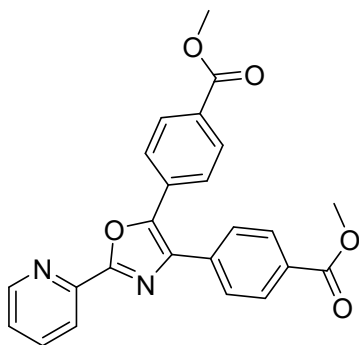

3h

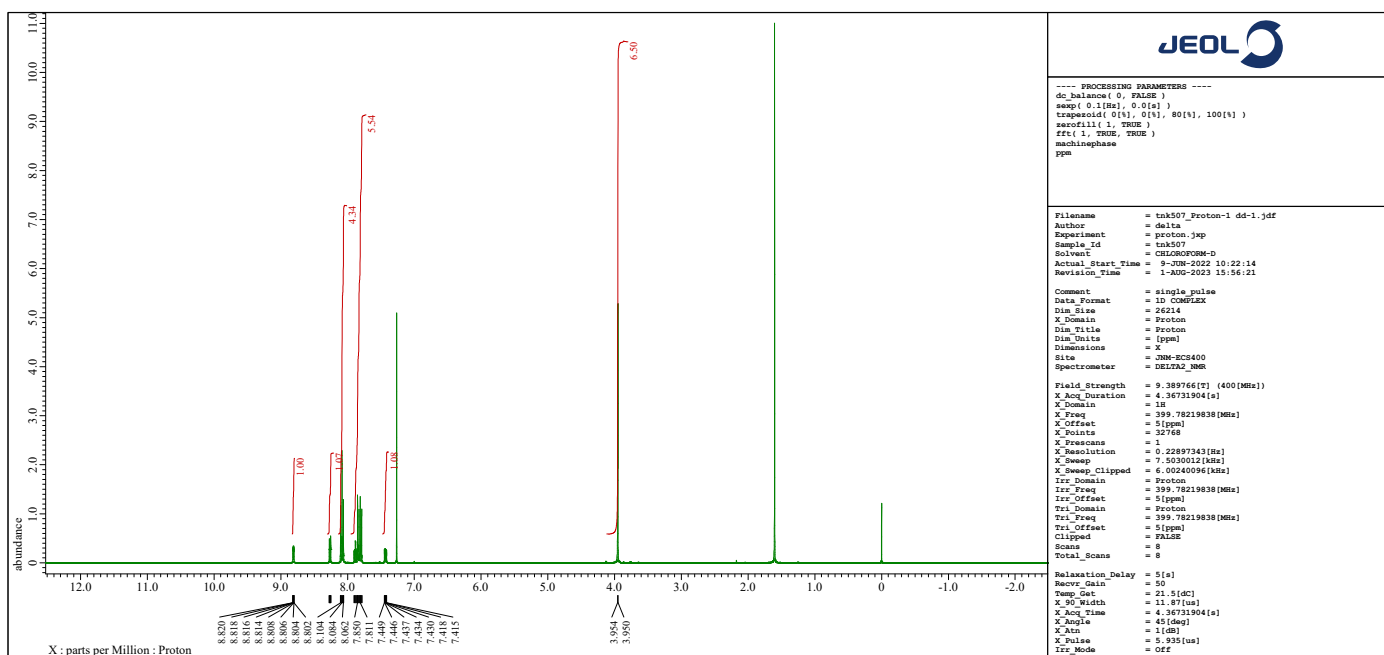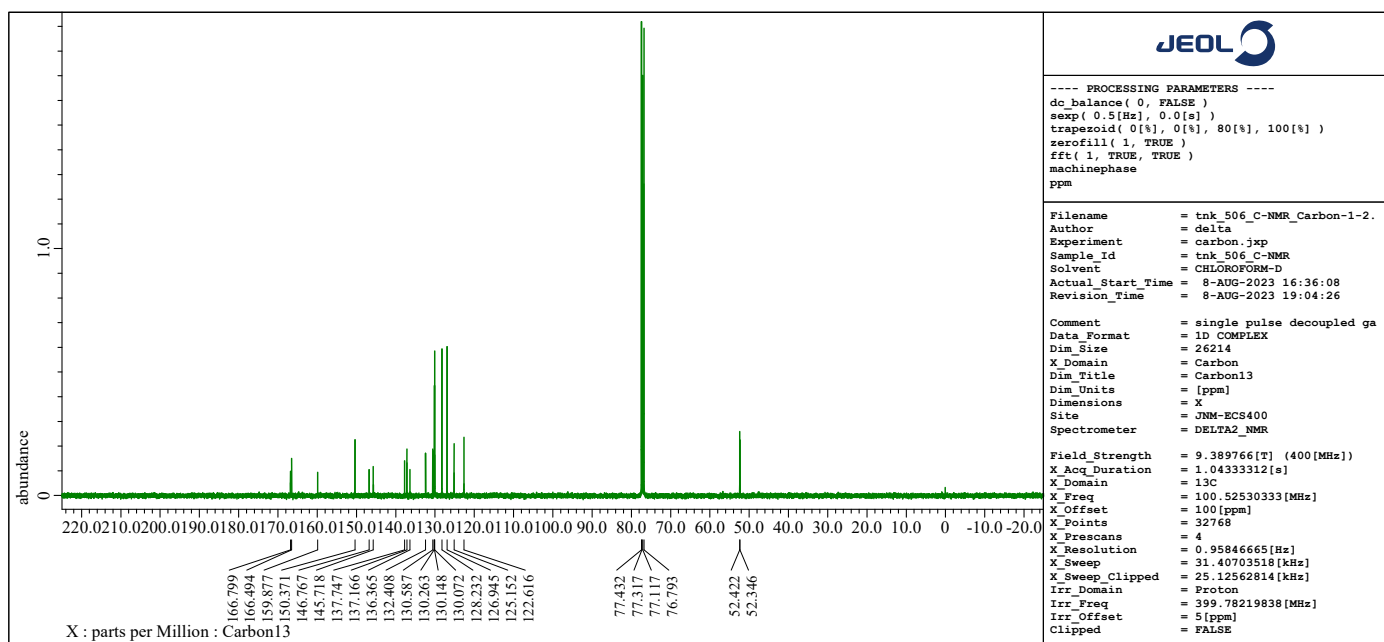

### 4,5-Bis(3-(benzyloxy)phenyl)-2-(pyridin-2-yl)oxazole (3i)

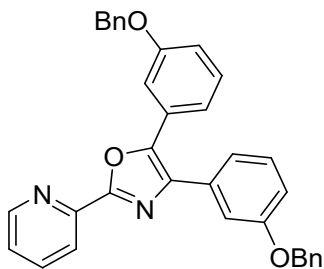

3i

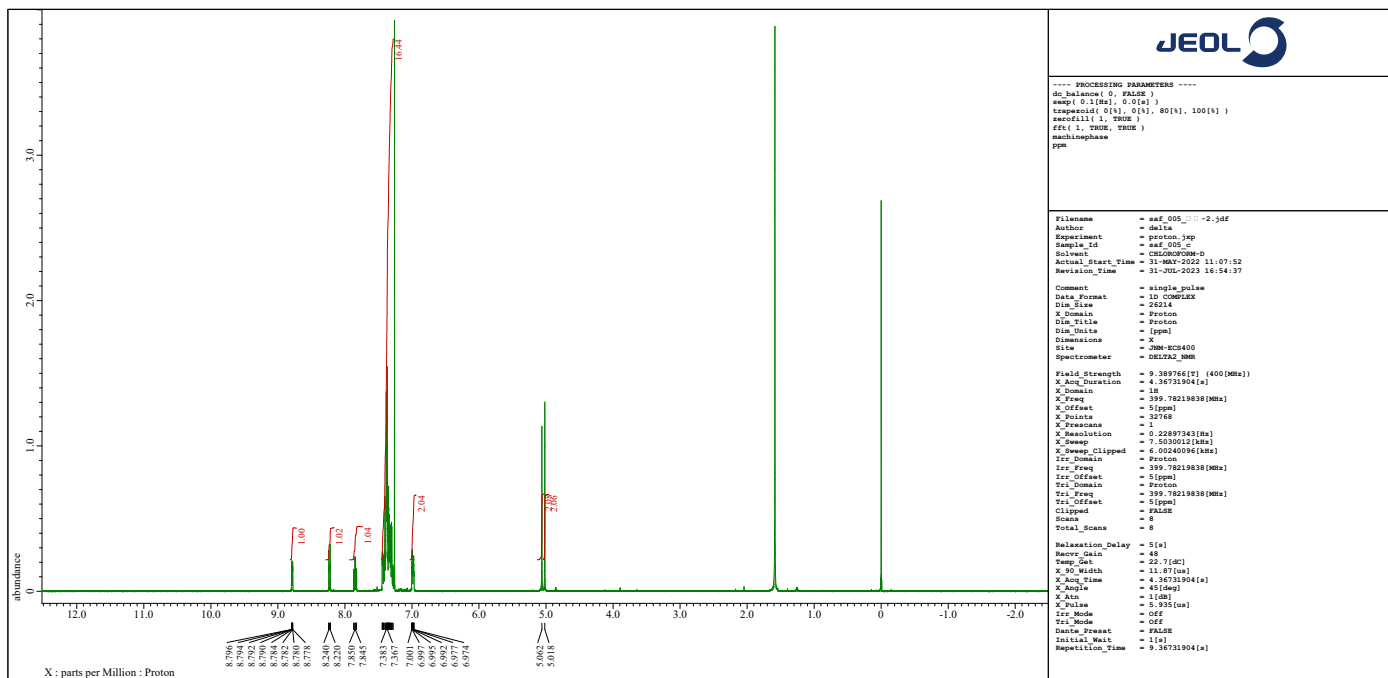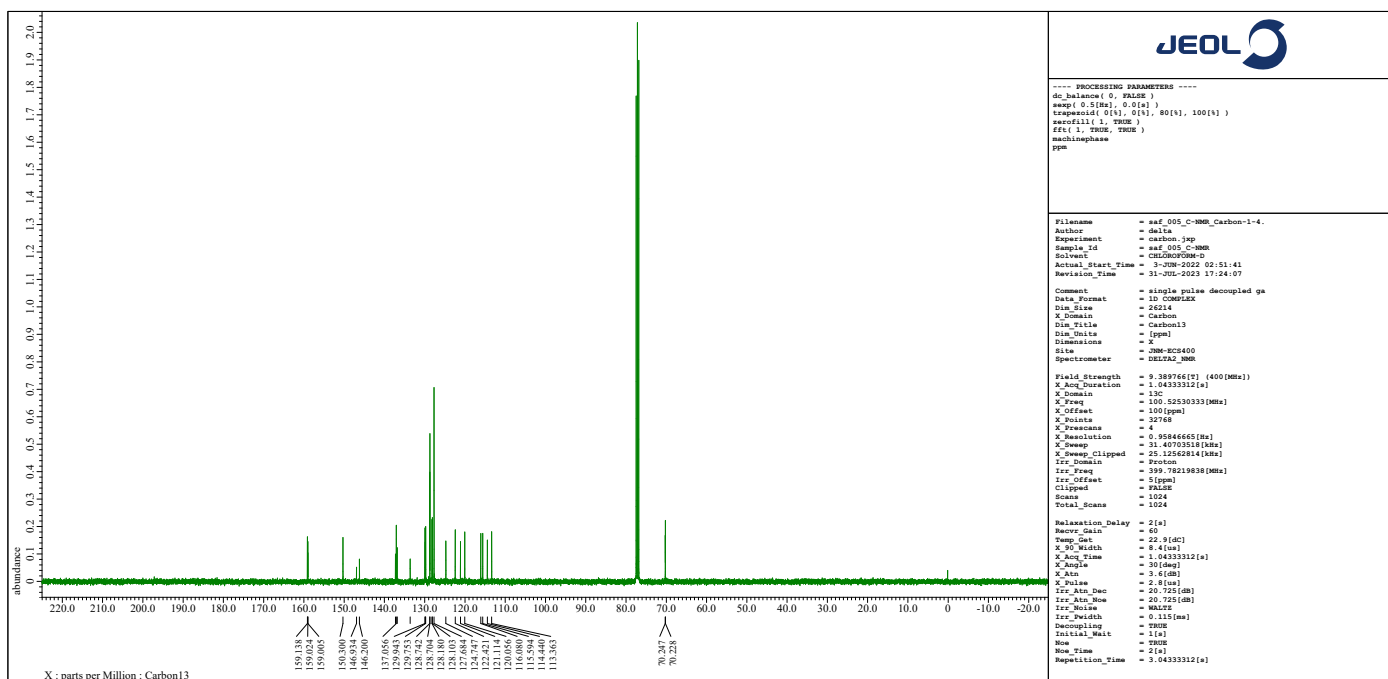

# 4,5-Bis(2-methoxyphenyl)-2-(pyridin-2-yl)oxazole (3j)

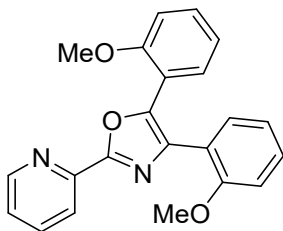

**3j**

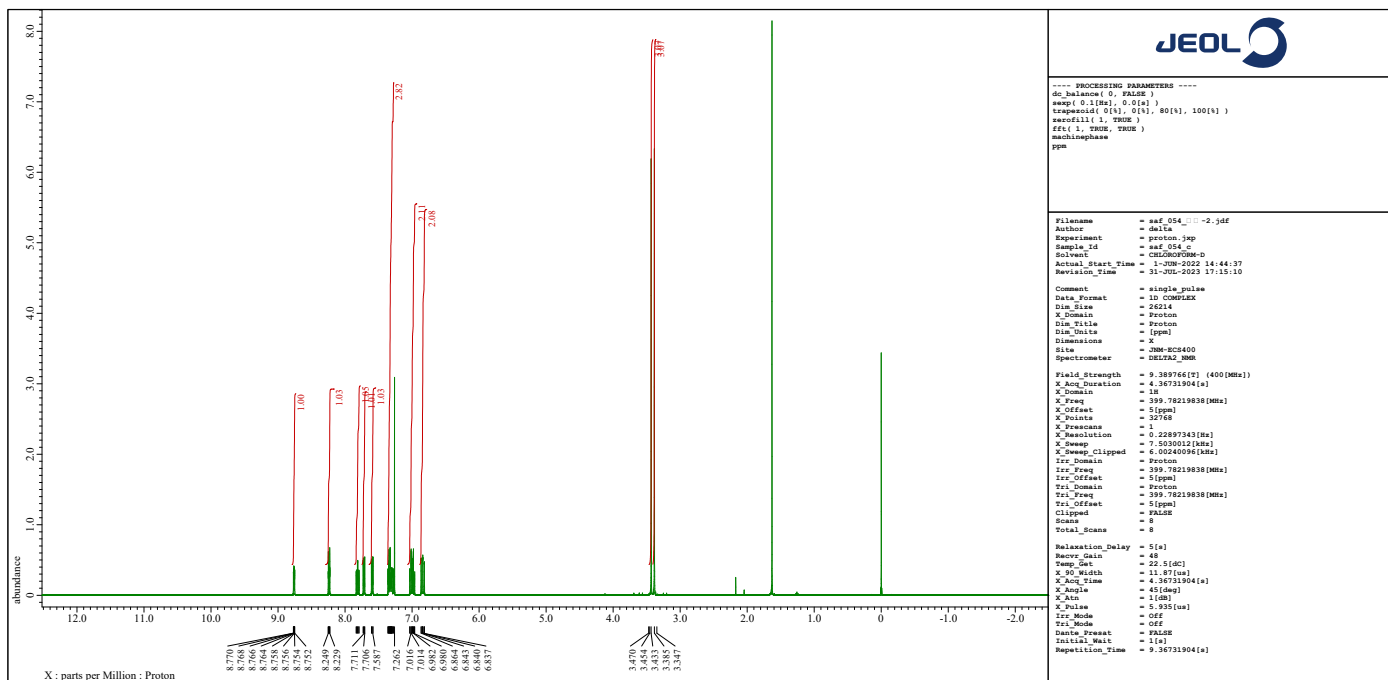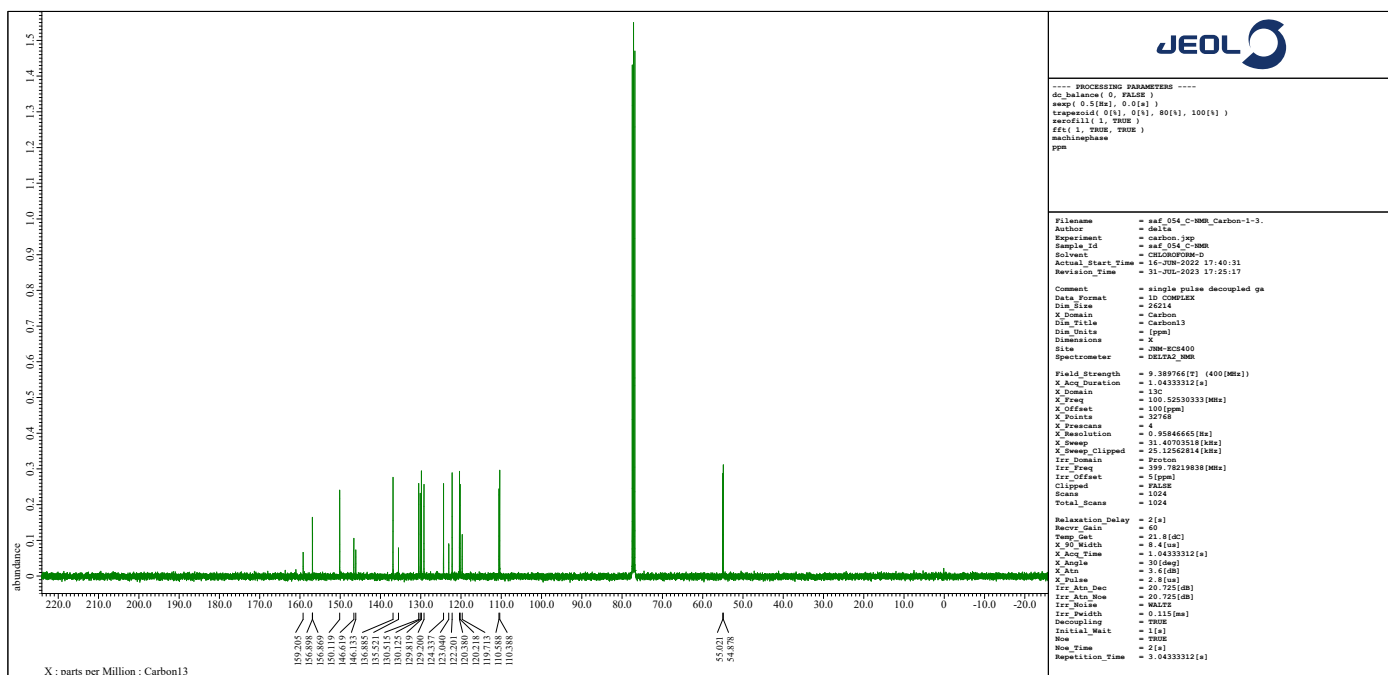

4,5-Bis(3-methoxyphenyl)-2-(pyridin-2-yl)oxazole (3k) □

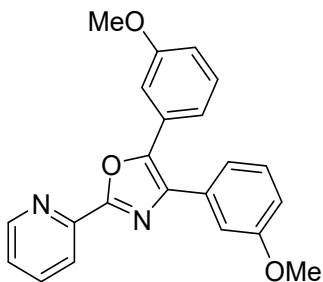

3k

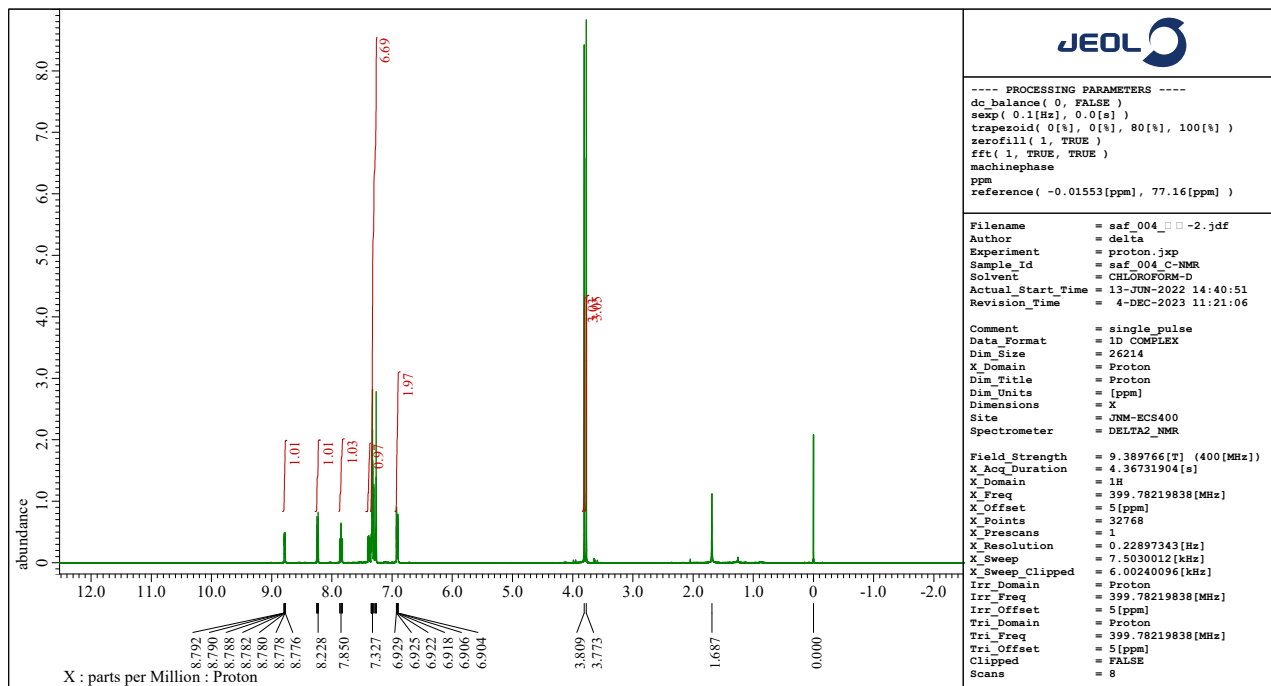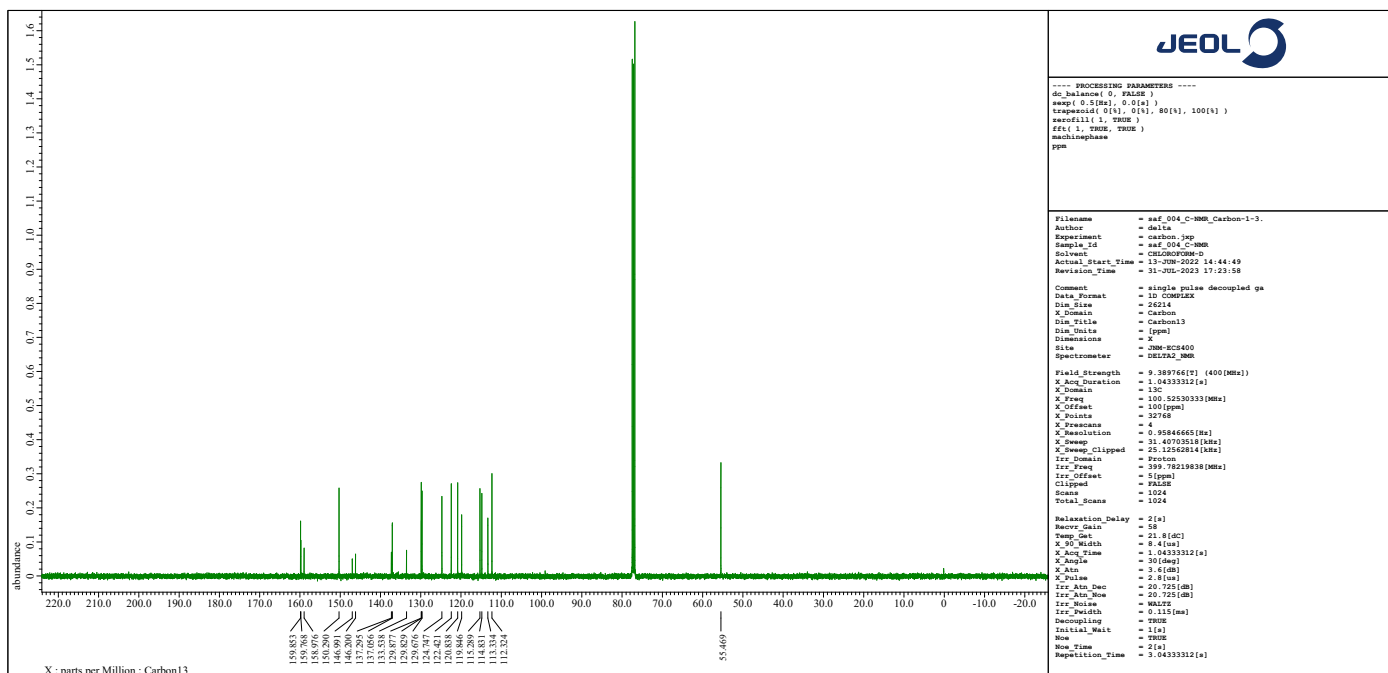

4,5-Bis(4-methoxyphenyl)-2-(pyridin-2-yl)oxazole (31) □

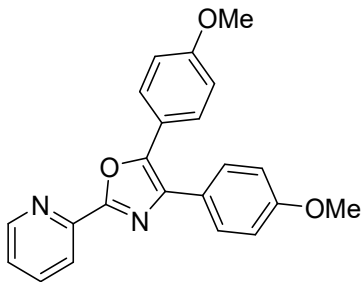

31

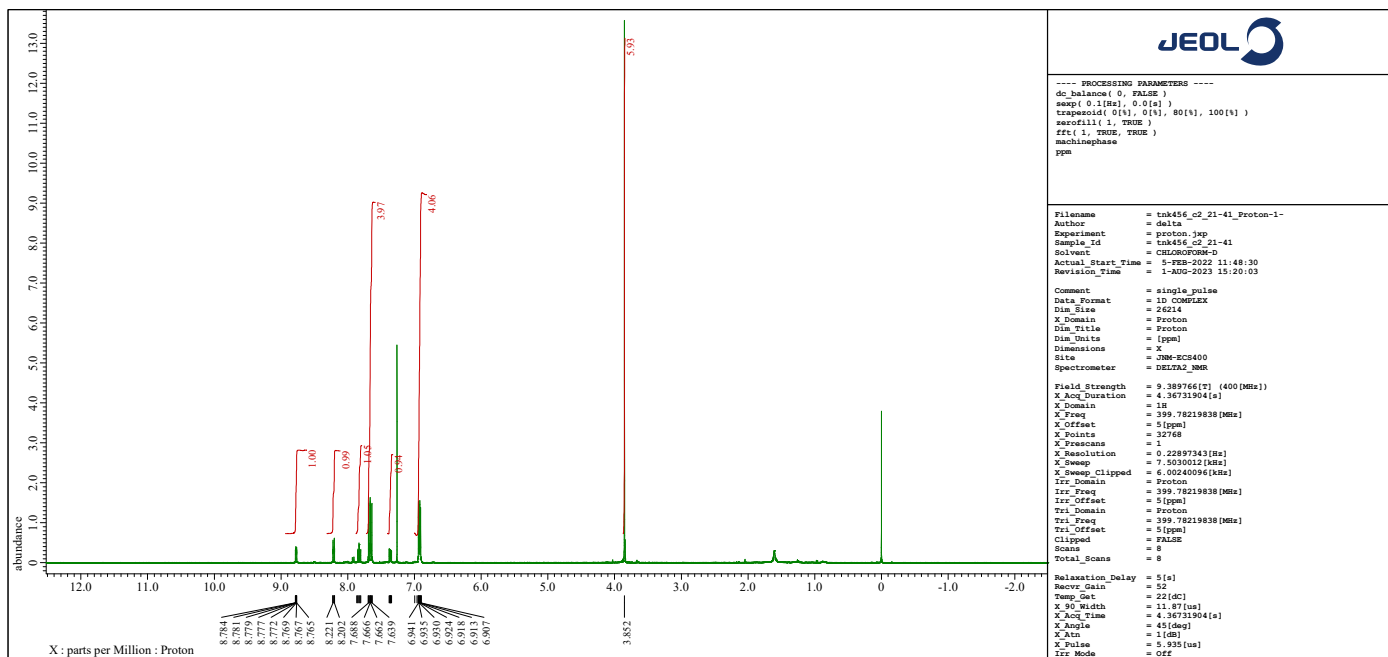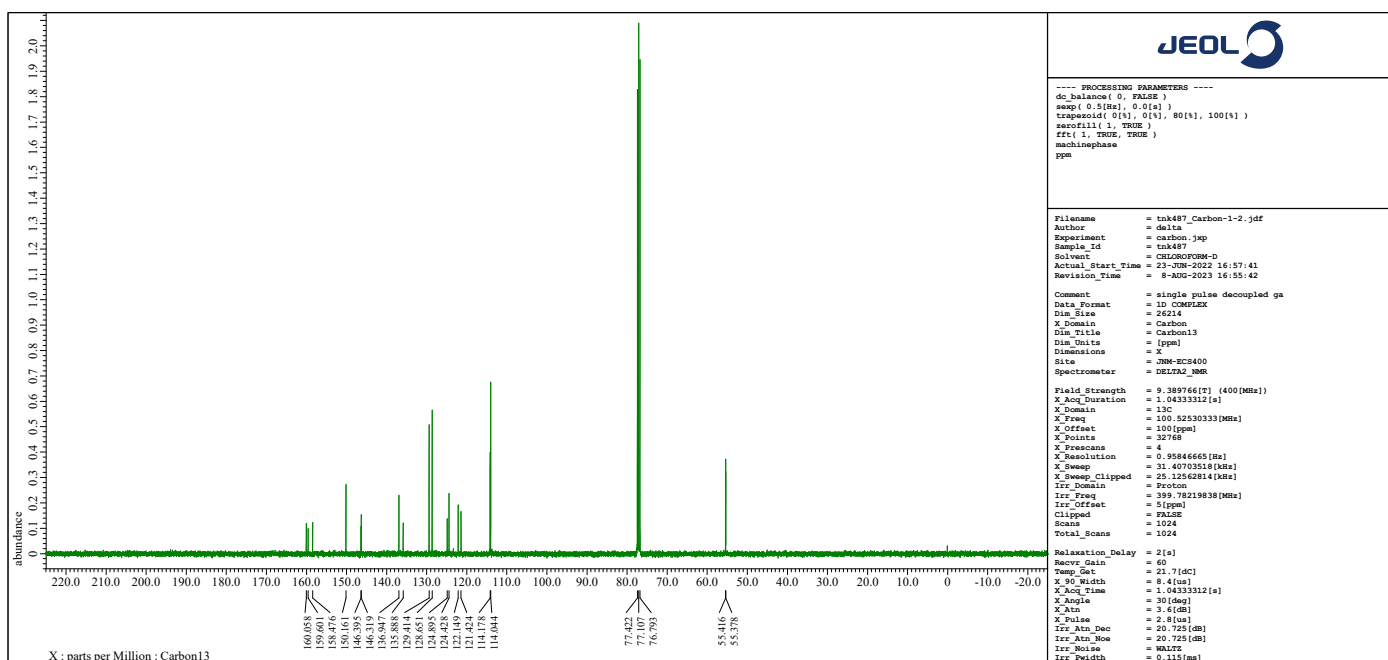



## 2-(Pyridin-2-yl)-4,5-di-o-tolylloxazole (3m)

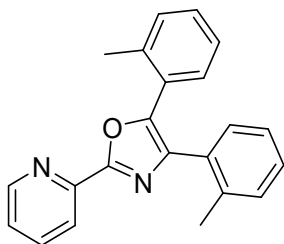

3m

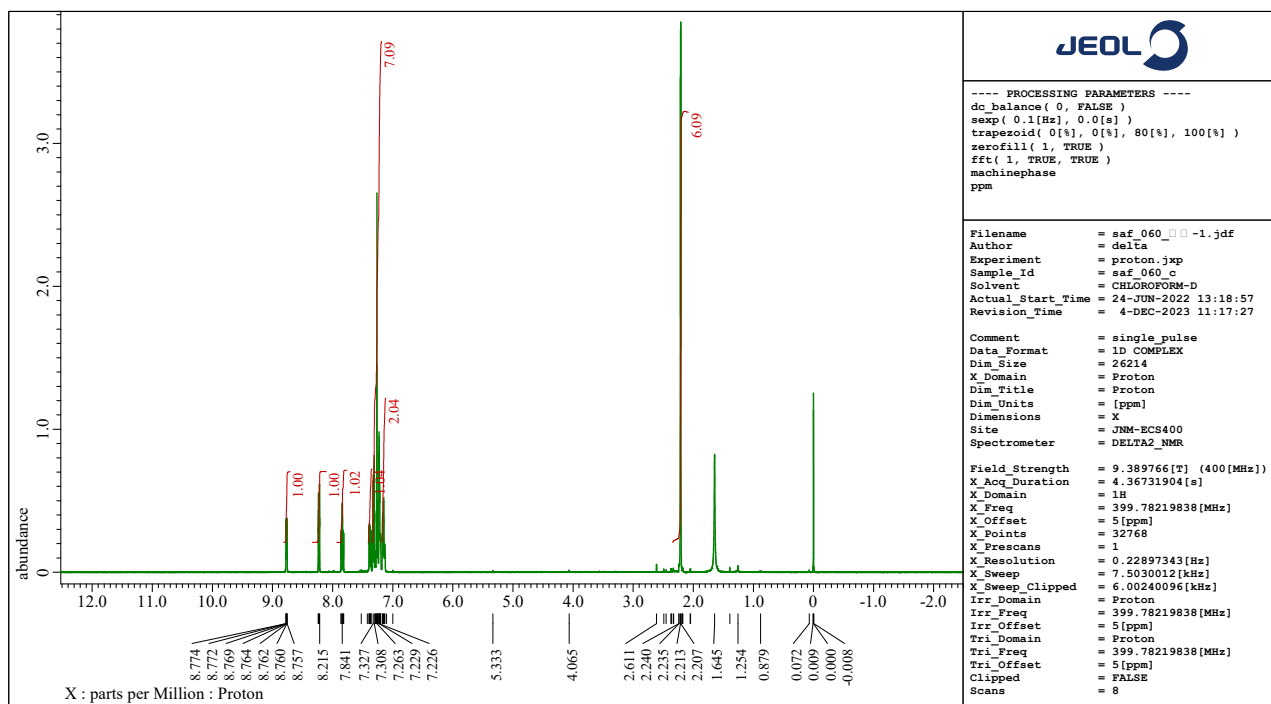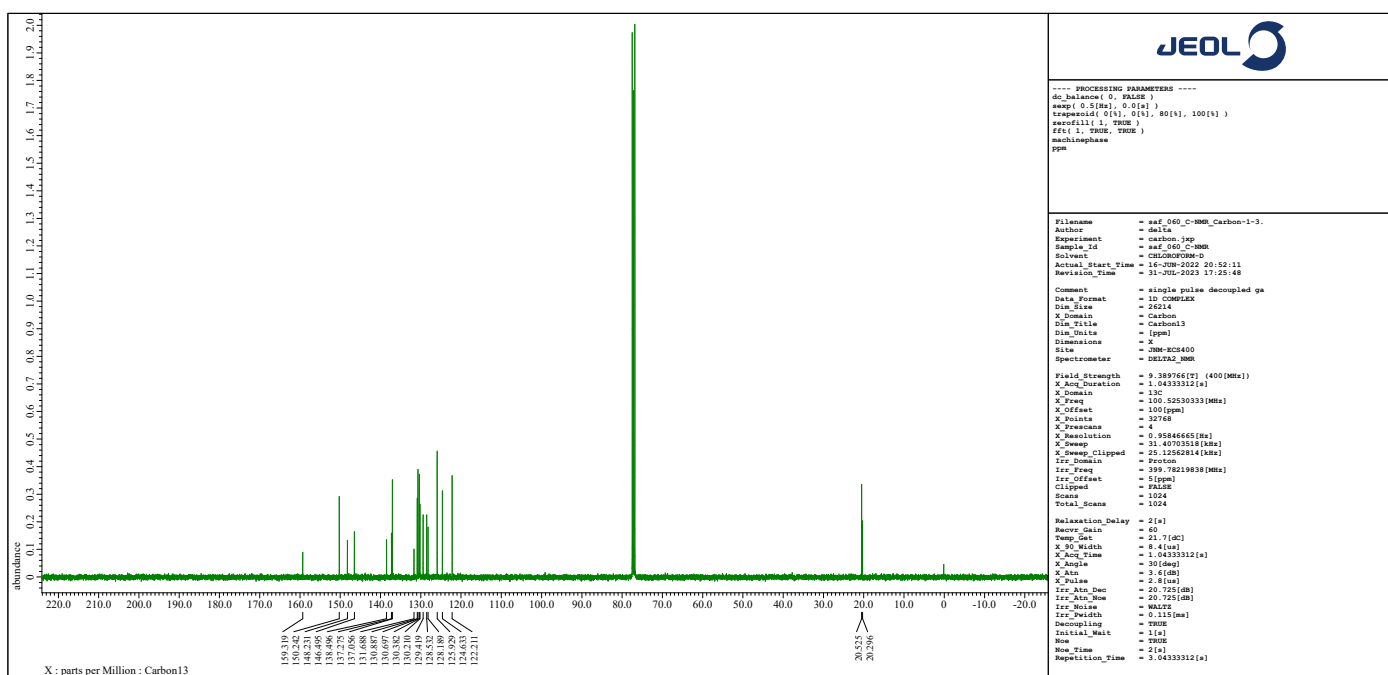

## 2-(Pyridin-2-yl)-4,5-di-m-tolylloxazole (3n)

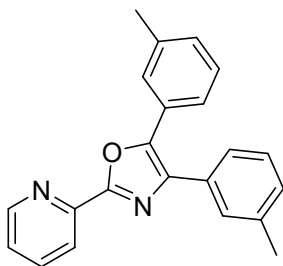

3n

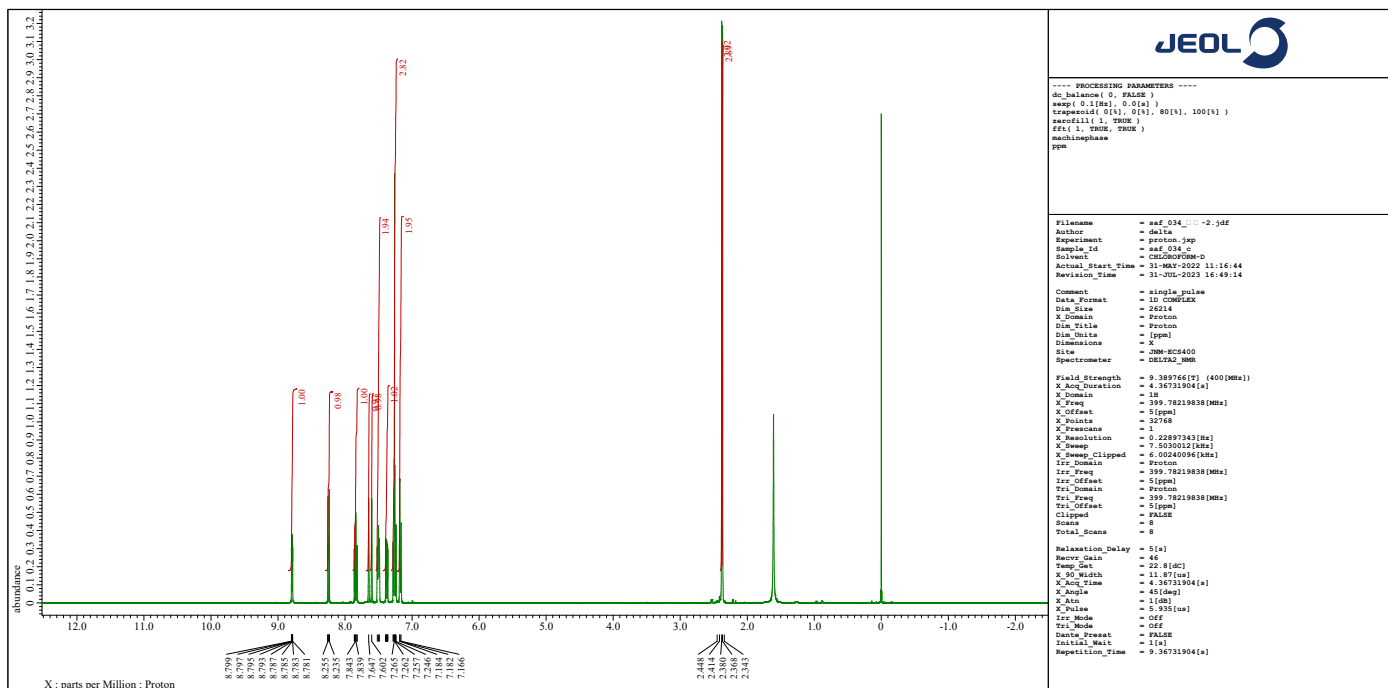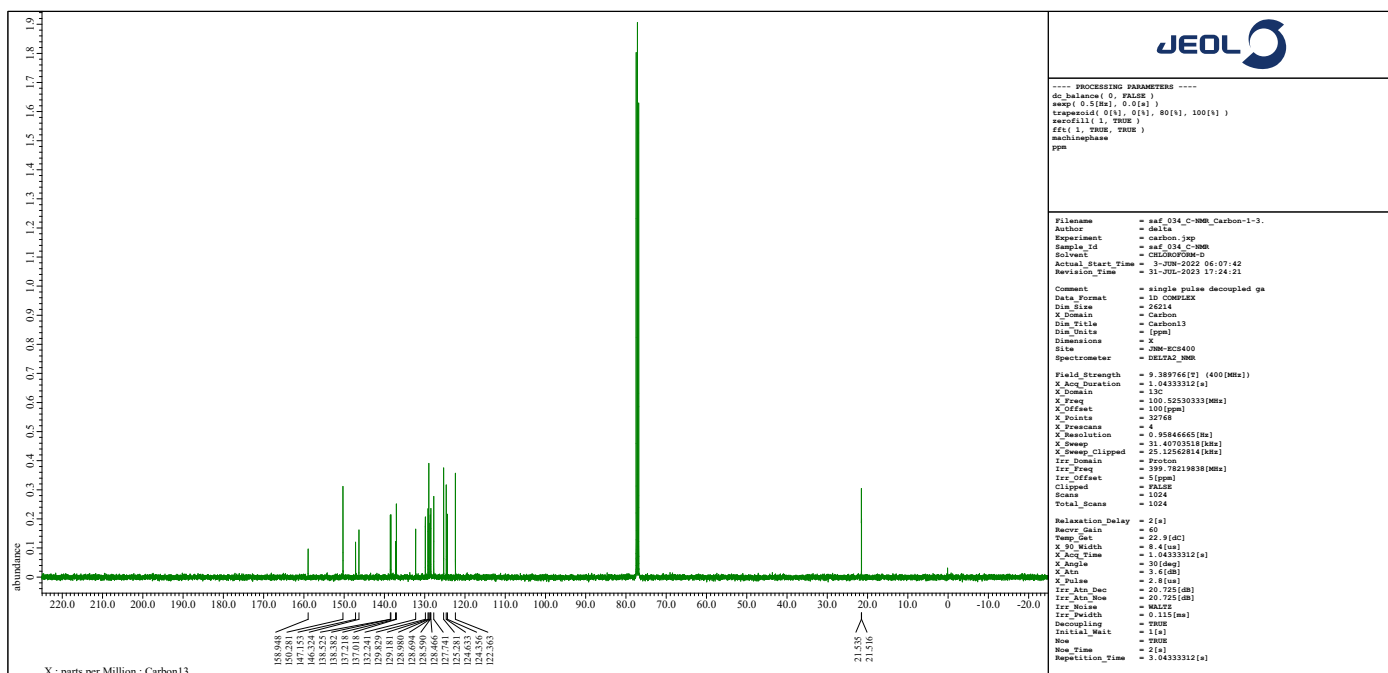

2- (Pyridin-2-yl)-4,5-di-m-tolylloxazole (3o)

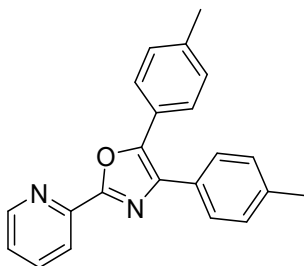

3o

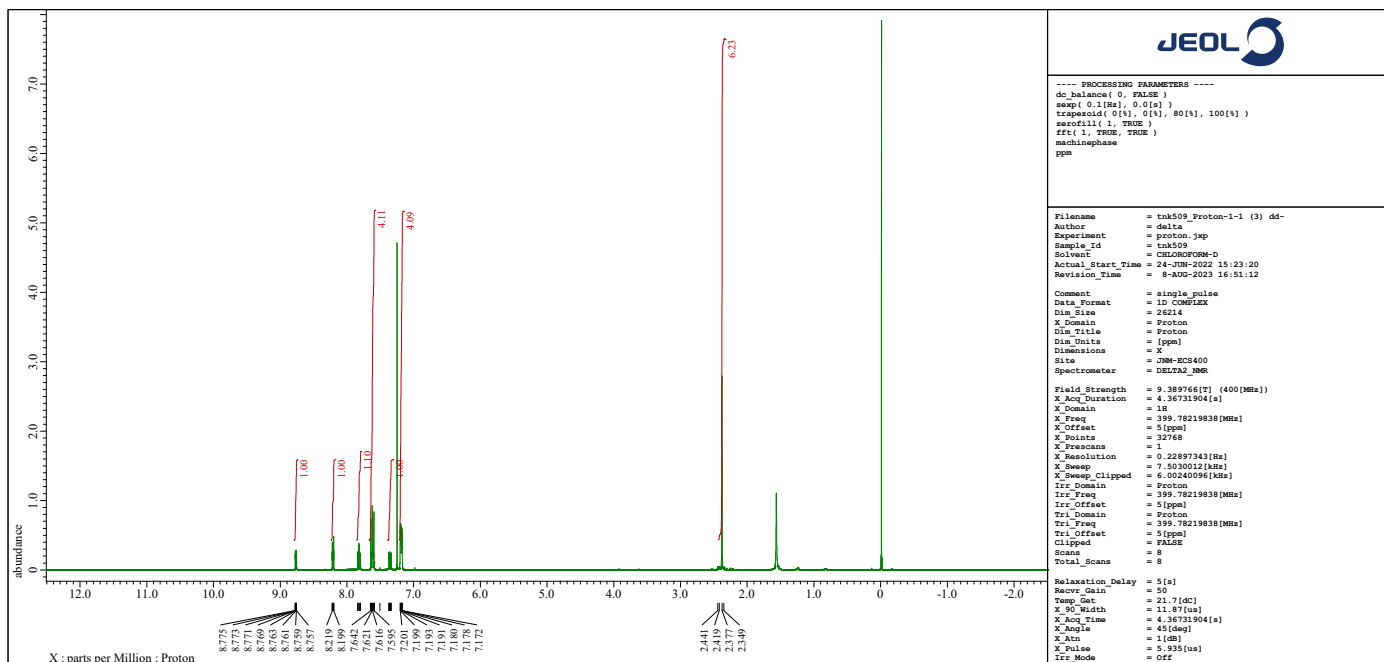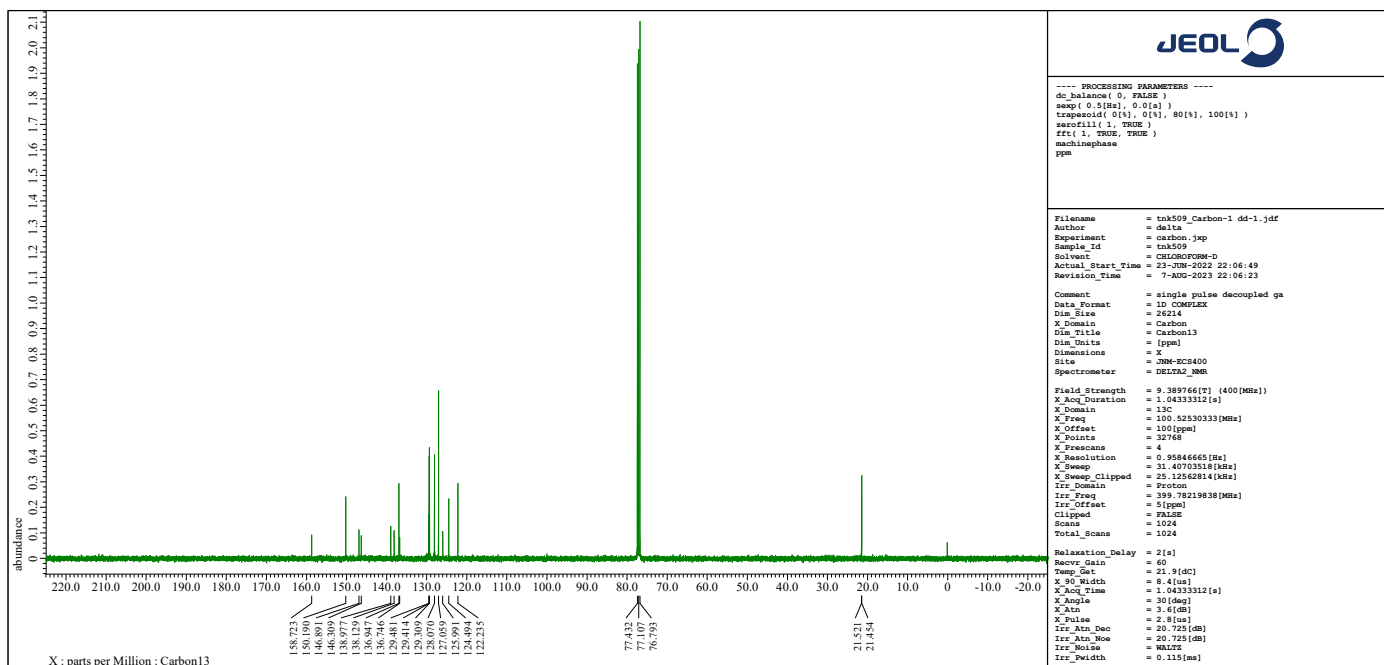

### 4,5-Di(naphthalen-1-yl)-2-(pyridin-2-yl)oxazole (3p)

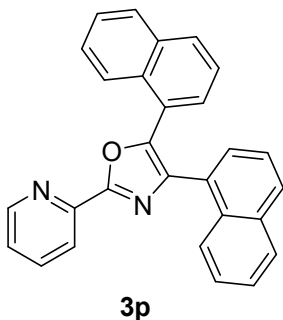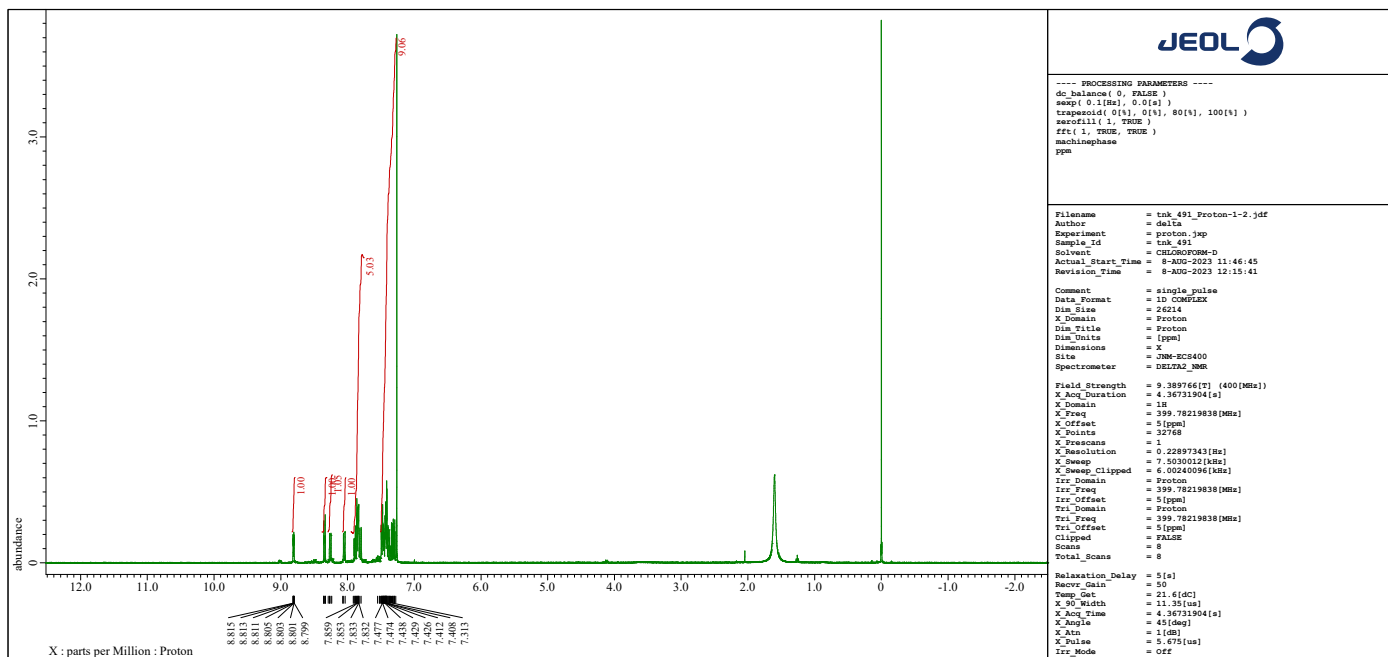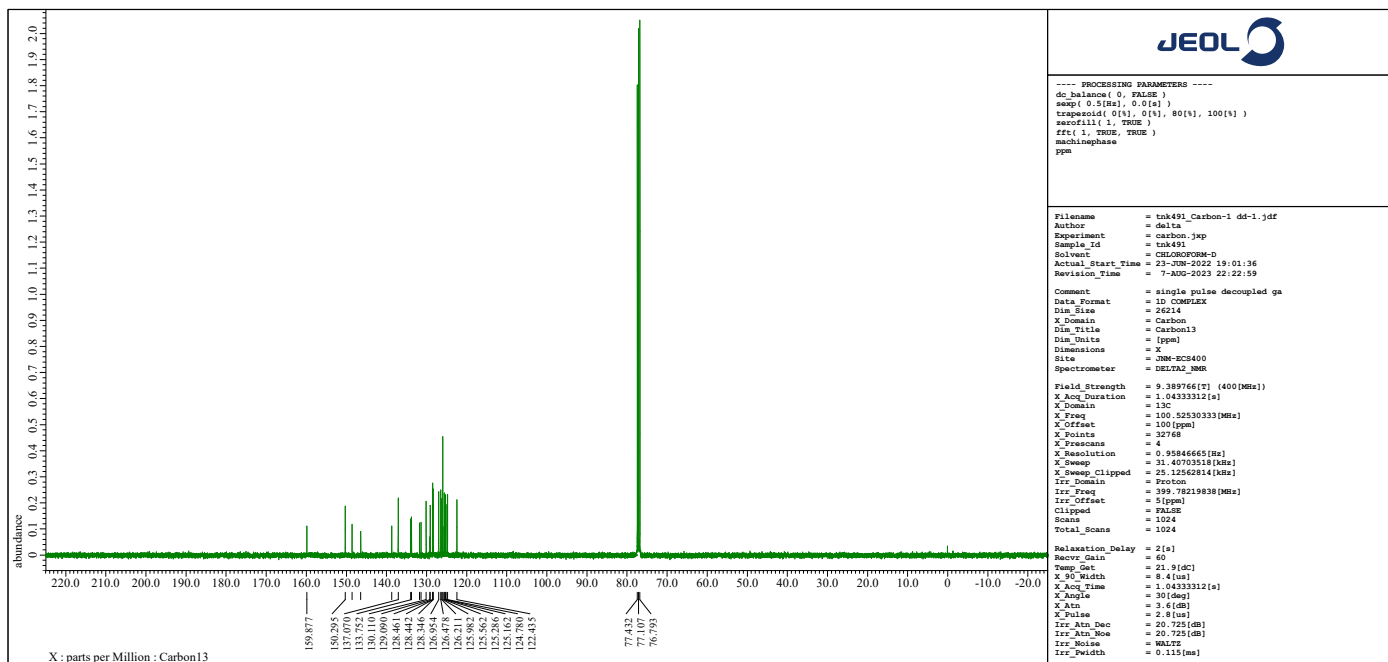

# 4,5-Di(naphthalen-2-yl)-2-(pyridin-2-yl)oxazole (3q)

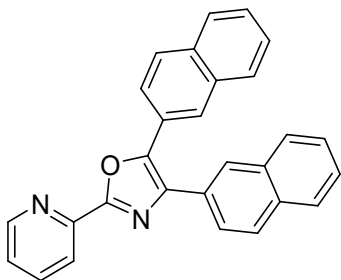

3q

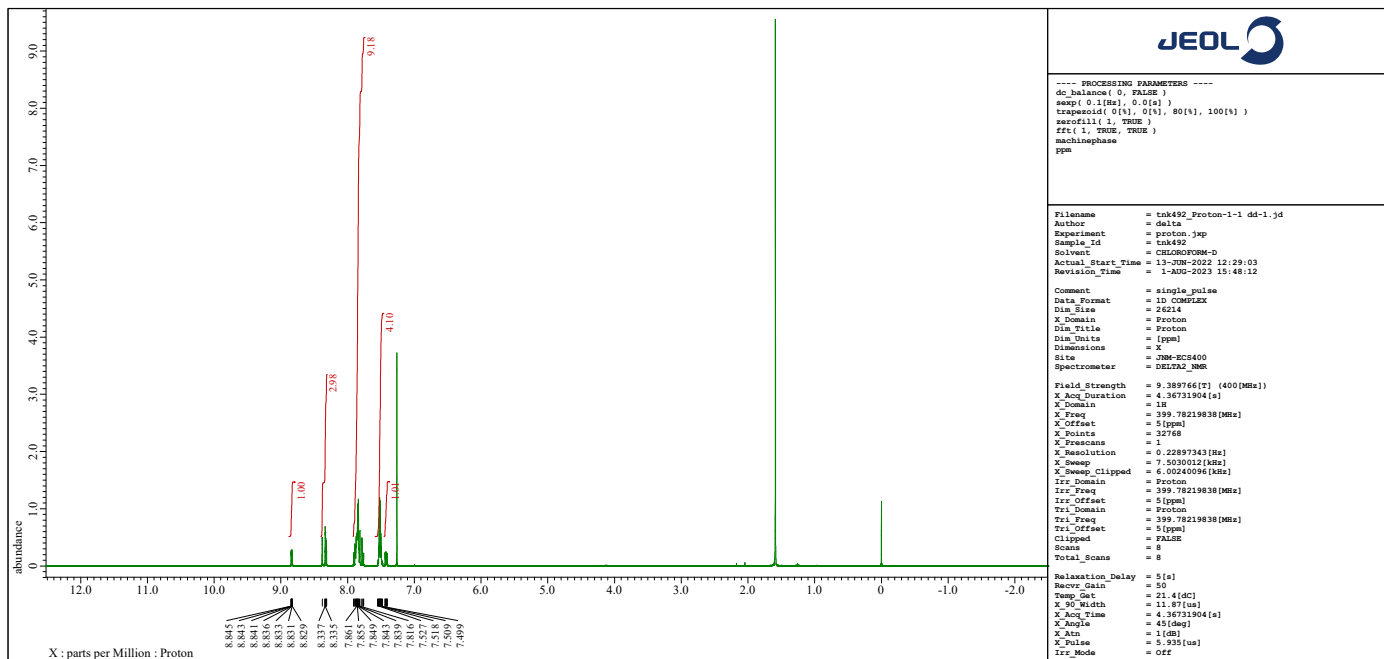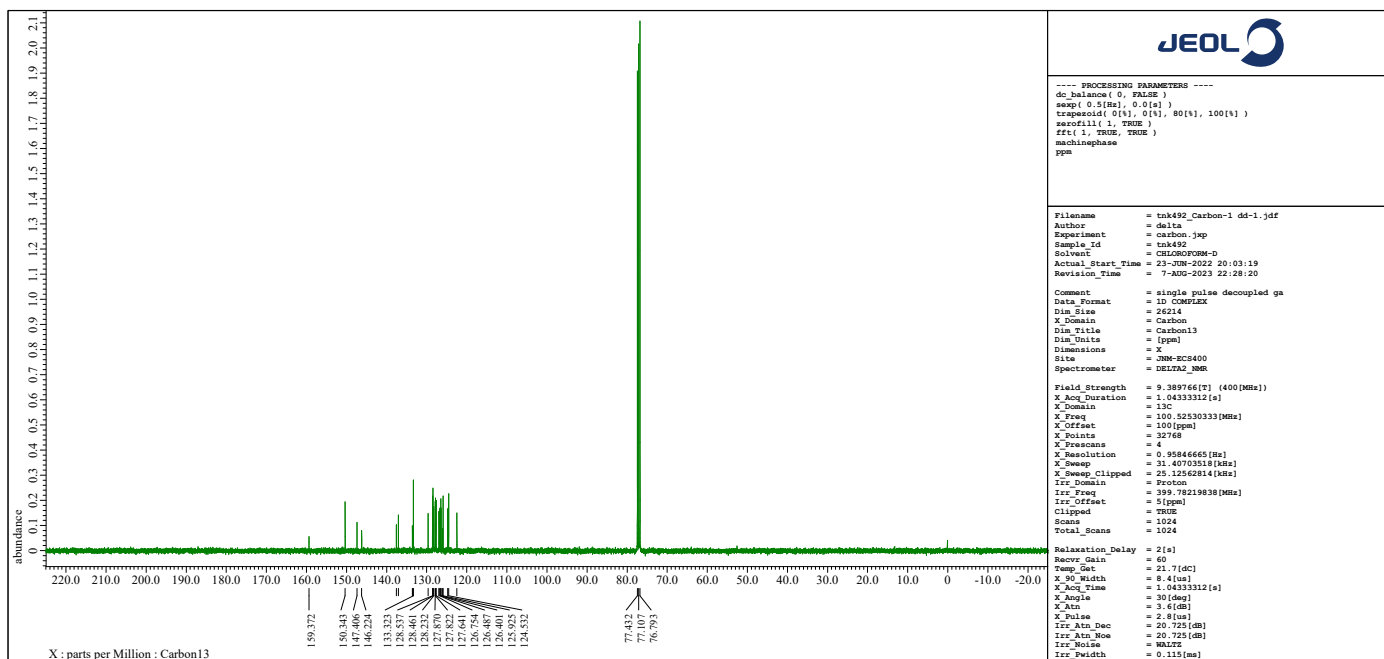

### 4,5-Di([1,1'-biphenyl]-4-yl)-2-(pyridin-2-yl)oxazole (3r)

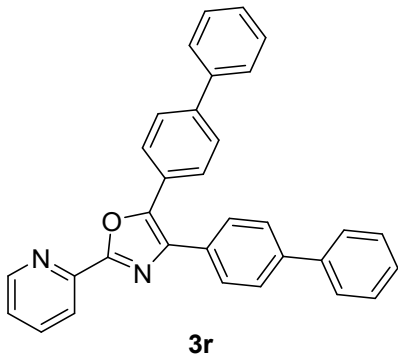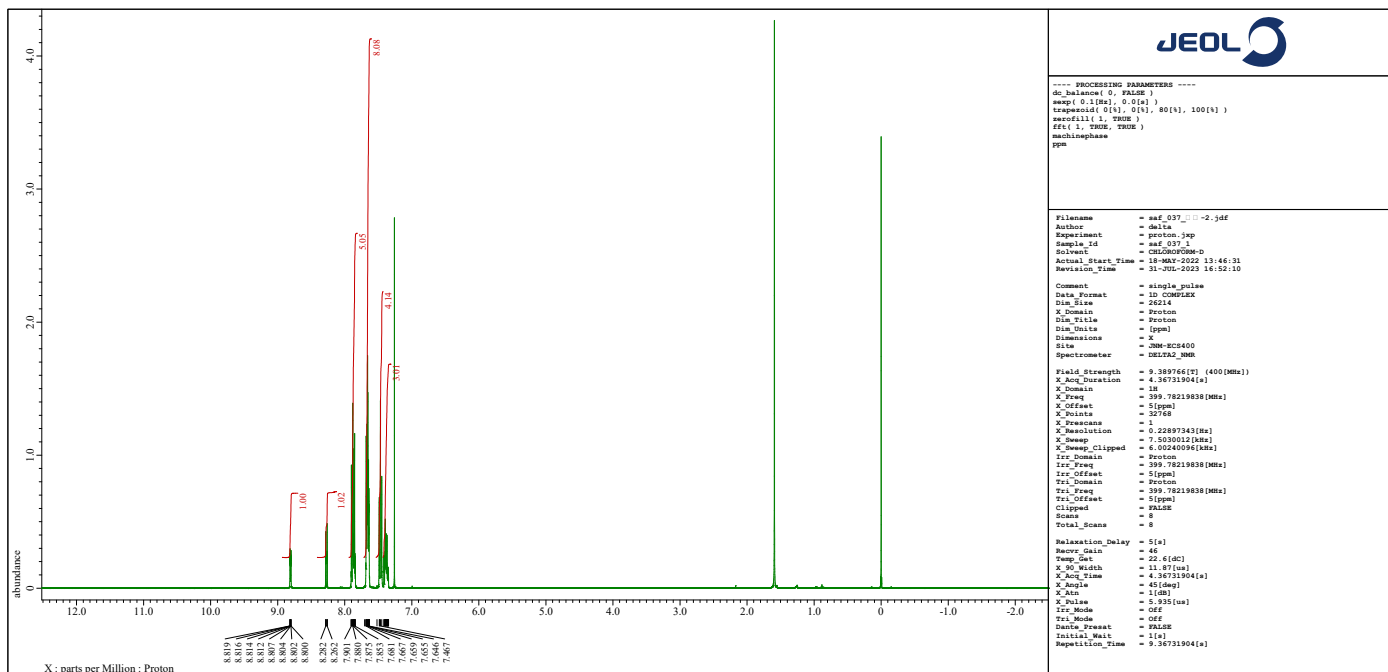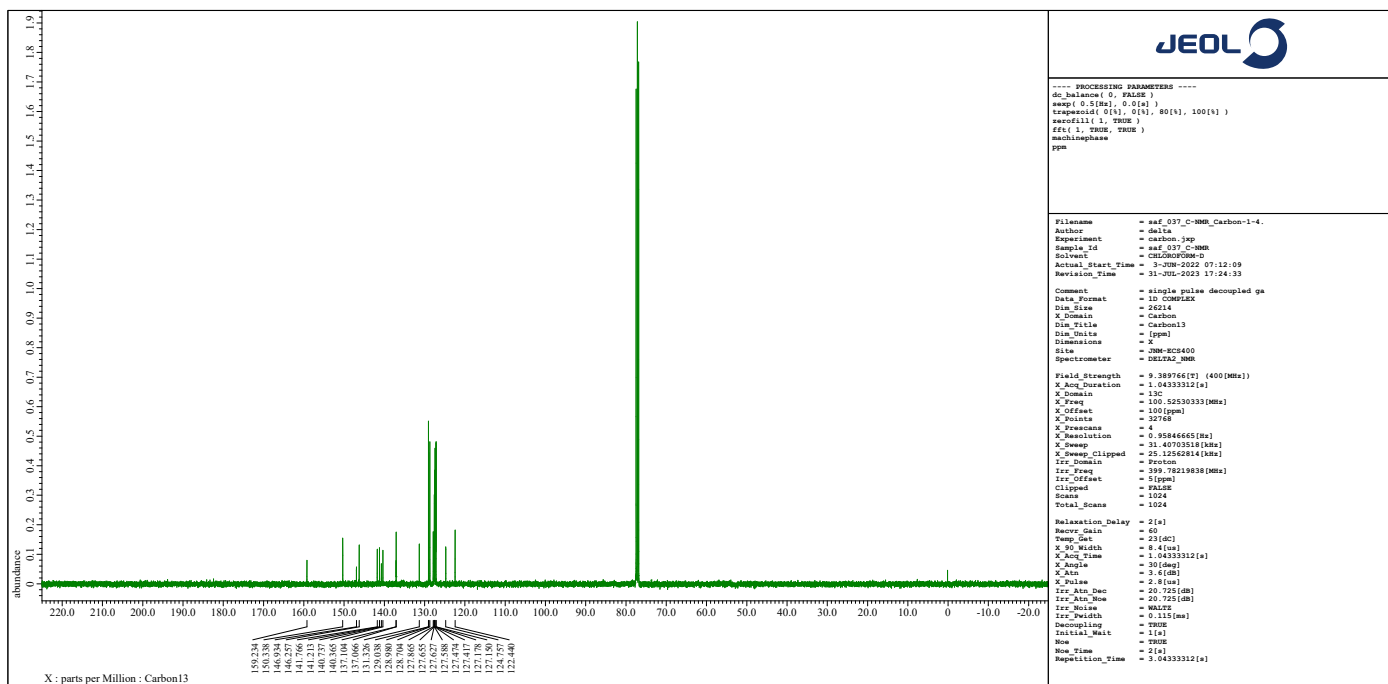

## 2-(Pyridin-2-yl)-4,5-di(thiophen-2-yl)oxazole (3s)

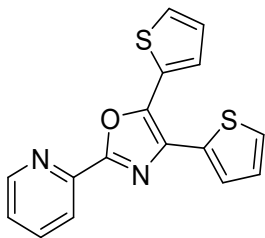

3s

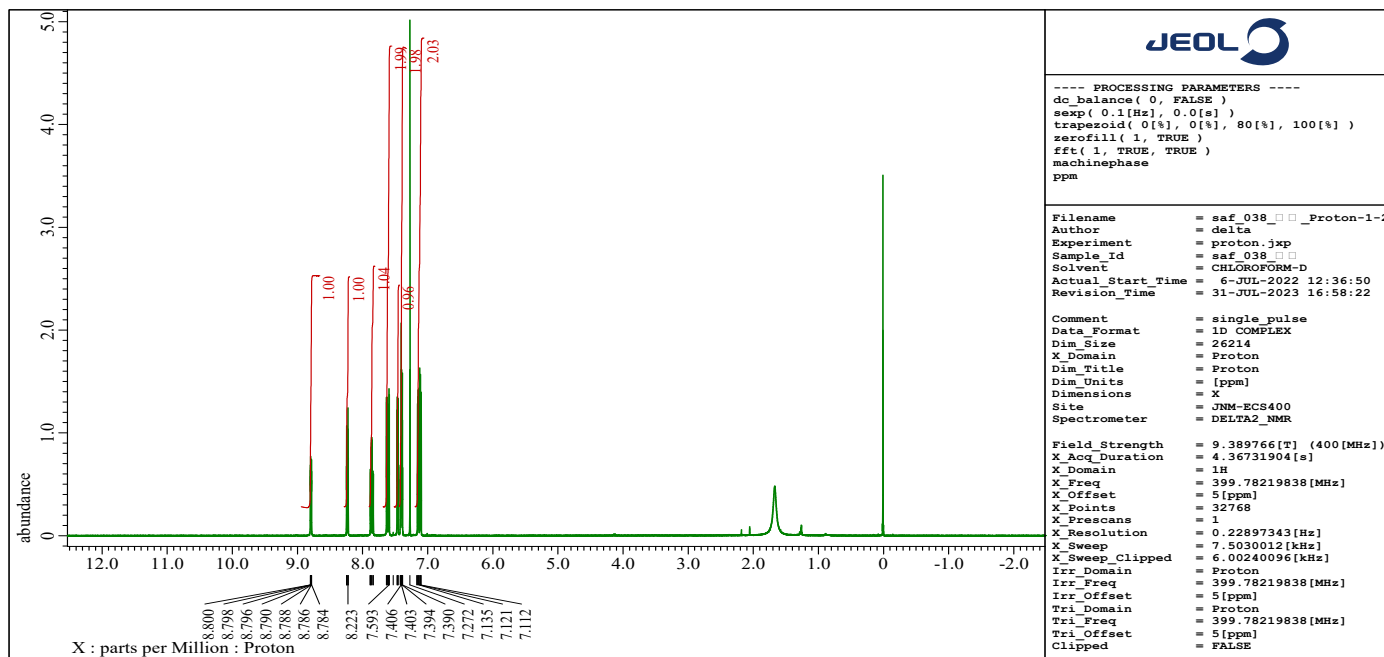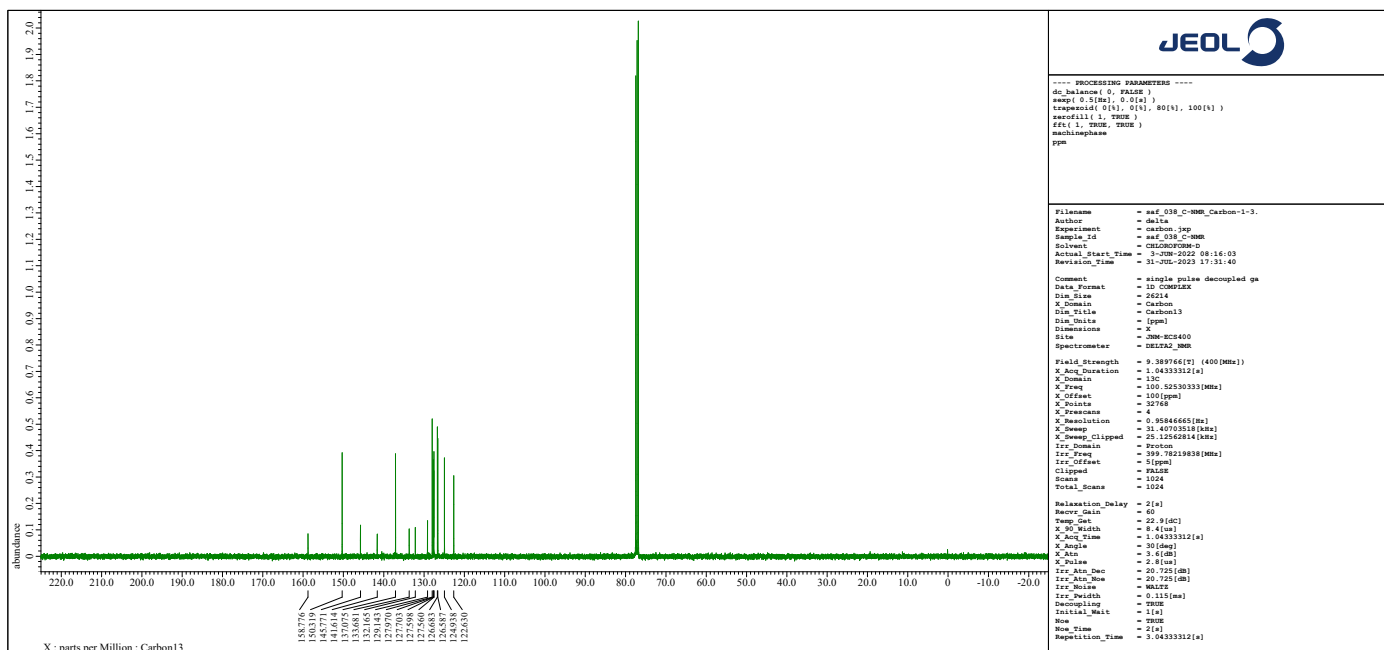

### 4,5-Diphenethyl-2-(pyridin-2-yl)oxazole (3t)

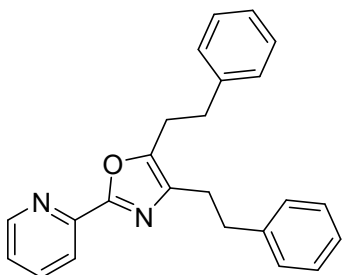

3t

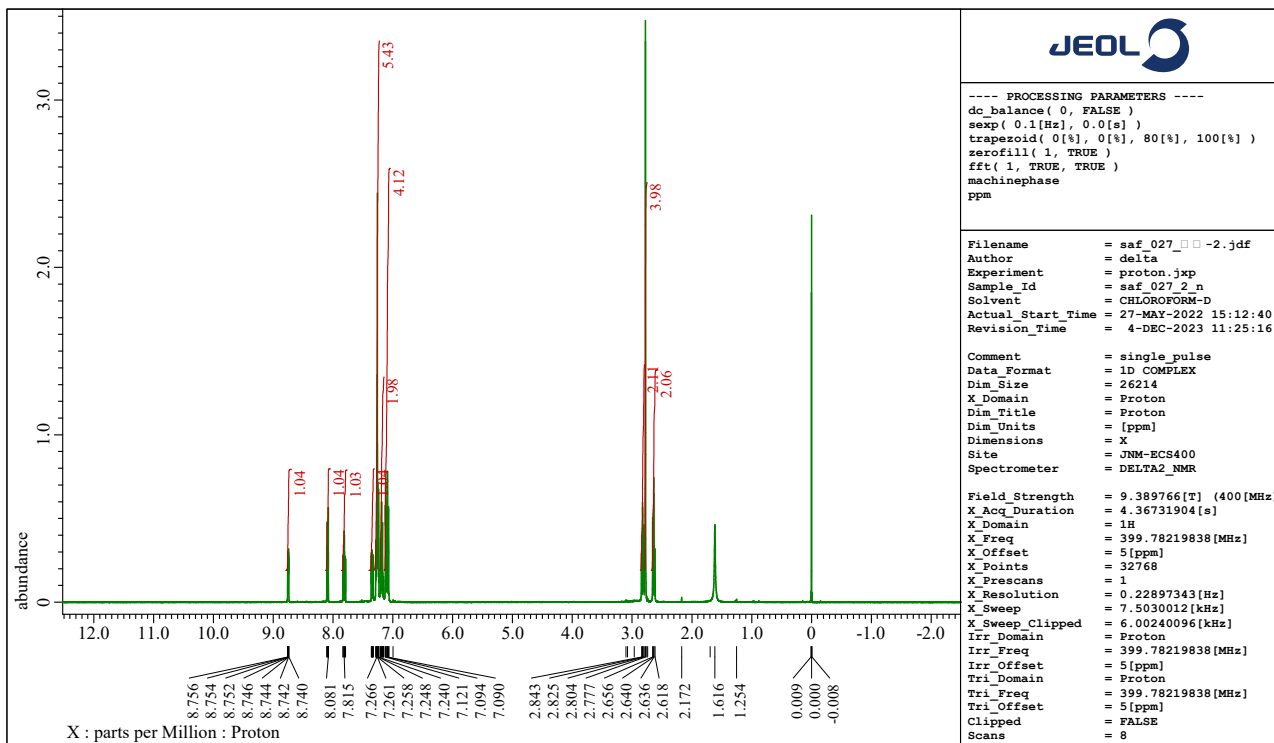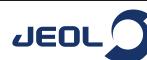

```

---- PROCESSING PARAMETERS ----
dc_balance( 0, FALSE )
sexp( 0.1[Hz], 0.0[s] )
trapezoid( 0[%], 0[%], 80[%], 100[%] )
zerofill( 1, TRUE )
fft( 1, TRUE, TRUE )
machinephase
ppm

Filename      = saf_027_00-2.jdf
Author       = delta
Experiment   = proton.jxp
Sample_Id    = saf_027_2_n
Solvent      = CHLOROFORM-D
Actual_Start_Time = 27-MAY-2022 15:12:40
Revision_Time   = 4-DEC-2023 11:25:16

Comment      = single pulse
Data_Format  = 1D COMPLEX
Dim_Size     = 26214
X_Domain    = Proton
Dim_Title    = Proton
Dim_Units    = [ppm]
Dimensions   = X
Site        = JNM-ECS400
Spectrometer = DELTA2_NMR

Field_Strength = 9.389766[T] (400[MHz])
X_Acq_Duration = 4.36731904[s]
X_Domain      = 1H
X_Freq       = 399.78219838[MHz]
X_Offset     = 5[ppm]
X_Points     = 32768
X_Prescans   = 1
X_Resolution = 0.22897343[Hz]
X_Sweep     = 7.5030012[kHz]
X_Sweep_Clipped = 6.00240096[kHz]
Irr_Domain   = Proton
Irr_Freq     = 399.78219838[MHz]
Irr_Offset   = 5[ppm]
Tri_Domain   = Proton
Tri_Freq     = 399.78219838[MHz]
Tri_Offset   = 5[ppm]
Clipped     = FALSE
Scans       = 8
    
```

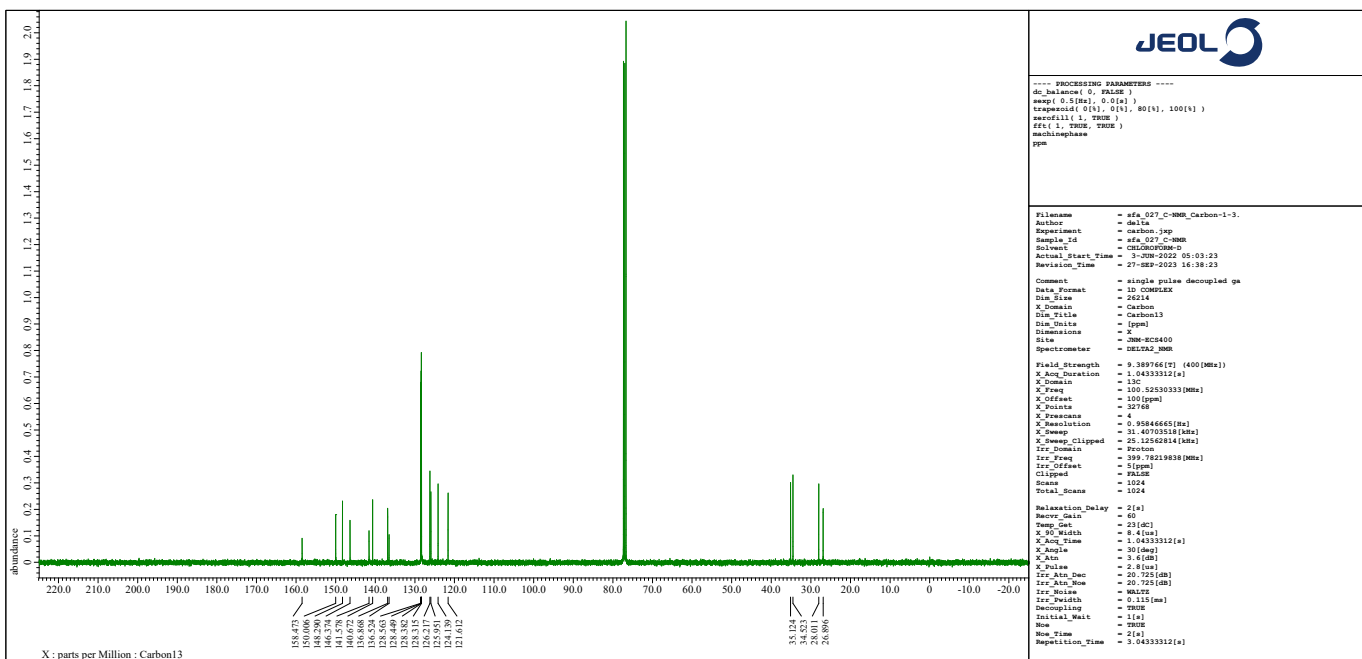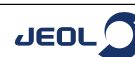

```

---- PROCESSING PARAMETERS ----
dc_balance( 0, FALSE )
sexp( 0.5[Hz], 0.0[s] )
trapezoid( 0[%], 0[%], 80[%], 100[%] )
zerofill( 1, TRUE )
fft( 1, TRUE, TRUE )
machinephase
ppm

Filename      = saf_027_C-NMR_Carbon-1-3
Author       = delta
Experiment   = carbon.jxp
Sample_Id    = saf_027_C-NMR
Solvent      = CHLOROFORM-D
Actual_Start_Time = 3-JUN-2022 05:03:23
Revision_Time   = 27-SEP-2023 16:38:23

Comment      = single pulse decoupled ga
Data_Format  = 1D COMPLEX
Dim_Size     = 26214
X_Domain    = Carbon
Dim_Title    = Carbon13
Dim_Units    = [ppm]
Dimensions   = X
Site        = JNM-ECS400
Spectrometer = DELTA2_NMR

Field_Strength = 9.389766[T] (400[MHz])
X_Acq_Duration = 1.0433312[s]
X_Domain      = 13C
X_Freq       = 100.52530333[MHz]
X_Offset     = 100[ppm]
X_Points     = 32768
X_Prescans   = 4
X_Resolution = 0.98846665[Hz]
X_Sweep     = 31.40753333[kHz]
X_Sweep_Clipped = 25.12562884[kHz]
Irr_Domain   = Proton
Irr_Freq     = 399.78219838[MHz]
Irr_Offset   = 5[ppm]
Clipped     = FALSE
Scans       = 1024
Total_Scans = 1024

Relaxation_Delay = 2[s]
Recvr_Gain      = 60
Temp_Set       = 23[deg]
X_90_Width    = 8.4[us]
X_Acq_Time    = 1.0433312[s]
X_Amp        = 30[deg]
X_Ain        = 3[us]
X_Pulse      = 2.8[us]
Irr_Ain_Dec  = 20.725[db]
Irr_Ain_90  = 20.725[db]
Irr_Width    = 0.115[us]
Decoupling    = WALTZ
Initial_Wait = 1[s]
Hsu         = 2[us]
Hsu_Time     = 2[s]
Repetition_Time = 3.0433312[s]
    
```



**<sup>18</sup>O-Picolinamide ([<sup>18</sup>O]-1a)**

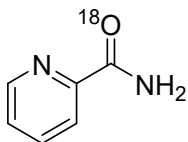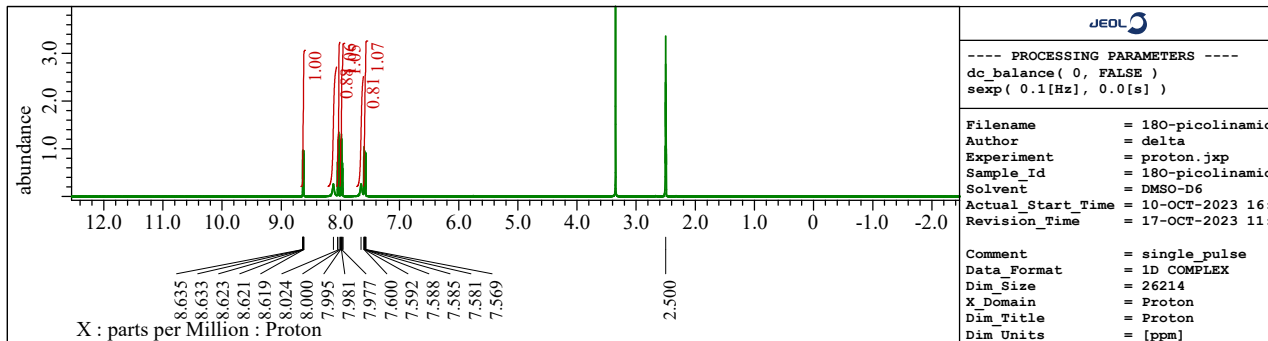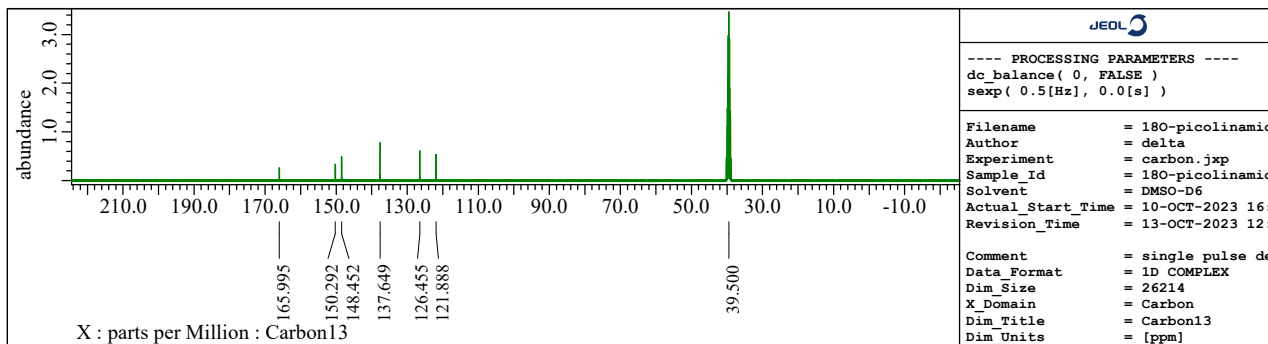

Supplement: d3ob01815f1.pdf [file d3ob01815f1.pdf]
